# Supplementary material
Source: publisher figshare collection journal article supplement (https://gsapubs.figshare.com/articles/dataset/_/20431734)
Supplement: Supplementary file 1 [file 2]

## Sheet: Sheet5 (2)
Table S1 Major (wt%) and trace (ppm) element compositions of apatite from thegranite apophysis and the Koktokay No. 3 pegmatite
Lithology	apatite from the ball-like granite																																		I	II	IV		V		VI	VIII
Sample	KTH2-01	KTH2-02	KTH2-04	KTH2-06	KTH2-07	KTH2-08	KTH2-09	KTH2-10	KTH2-11	KTH2-12	KTH2-13	KTH2-14	KTH2-15	KTH2-16	KTH2-17	KTH2-18	KTH2-19	KTH2-21	KTH2-22	KTH2-23	KTH2-24	KTH2-25	KTH2-26	KTH2-27	KTH2-28	KTH2-29	KTH2-30	KTH2-31	KTH2-32	KTH2-33	KTH2-34	KTH2-35	KTH2-36	KTH2-37	KH-30	KH-42	HH-44	KH-52	KH-54	KH-53	KH-50	KH-65
P2O5	42.001	40.834	41.1	41.577	41.792	42.045	41.861	41.109	41.681	41.23	41.568	41.828	42.349	41.971	42.663	41.368	42.168	41.304	41.803	41.748	42.592	41.936	42.037	42.02	41.94	41.677	42.169	41.779	41.587	42.397	42.128	42.539	42.319	40.165	42.56	42.72	42.59	42.5	42.49	42.61	42.23	42.59
FeO	0.015	0.037	0.014	0.019	0.02	0.274	0.012	0	0.04	0.078	0.054	0.024	0.038	0.047	0.013	0.059	0.004	0.018	0.034	0.103	0	0.01	0.022	0.016	0.026	0.025	0.001	0.03	0.109	0.026	0.001	0.032	0.004	0.037	0.13	0.03	0.12	0.13	0.06	0.03	0.07	0.03
MnO	2.578	1.436	2.079	2.139	1.298	3.554	1.31	0.614	2.323	2.665	1.791	1.942	1.399	2.715	0.776	3.392	1.198	1.88	2.182	3.344	0.251	1.27	1.495	1.267	0.98	1.462	1.442	1.568	3.743	1.46	1.118	1.709	0.839	2.479	4.77	1.04	4.87	6.39	4.35	3.8	4.9	3.61
CaO	53.896	52.604	51.833	54.738	54.499	52.054	54.23	55.726	53.802	53.693	53.836	54.46	54.983	53.284	54.8	52.282	54.737	54.42	54.003	52.437	55.966	55.587	54.069	54.26	54.7	53.434	55.058	54.484	51.967	54.936	54.709	54.093	55.3	50.16	49.92	53.31	49.89	48.64	50.3	51	49.91	51.09
Na2O	0.013	0.025	0.011	0.018	0.004	0.004	0.031	0	0.05	0.016	0.03	0.017	0.034	0.023	0.012	0	0.019	0.008	0.012	0.018	0	0.131	0	0.041	0	0.034	0.011	0	0.026	0	0	0.034	0.017	0.057	0	0	0	0	0	0	0	0
F	2.992	2.46	2.4	4.837	4.304	3.987	4.105	3.728	3.703	4.069	3.612	3.783	4.572	4.448	4.282	3.655	3.949	4.597	4.221	3.974	3.961	5.441	3.988	4.026	3.699	3.757	4.073	3.69	4.306	4.595	4.016	4.02	3.533	5.778	3.53	3.69	3.62	3.53	3.59	3.52	3.5	3.62
Cl	0.002	0	0.005	0.004	0.001	0	0.002	0.007	0	0.006	0	0	0.009	0	0.004	0.004	0.007	0.005	0.004	0.002	0.001	0.005	0.004	0.005	0	0	0	0.005	0.001	0.001	0.001	0	0.009	0.086	0	0	0	0	0	0	0	0
F corr.	1.44402	1.18726	1.1583	2.33446	2.07722	1.92423	1.98118	1.79923	1.78716	1.9638	1.74324	1.82577	2.20656	2.14672	2.0666	1.764	1.90589	2.21863	2.03716	1.91795	1.91168	2.62597	1.92471	1.94305	1.78523	1.81322	1.96573	1.78089	2.07819	2.21766	1.93822	1.94015	1.70512	2.78861	1.70367	1.78089	1.7471	1.70367	1.73263	1.69884	1.68919	1.7471
H2O*	1.10011	1.16488	1.18032	0.673131	0.789542	0.862799	0.833473	0.911049	0.926688	0.832028	0.939582	0.916155	0.748101	0.760664	0.814512	0.919646	0.880848	0.714019	0.810891	0.858963	0.896302	0.547091	0.863754	0.854928	0.931353	0.900419	0.860759	0.931292	0.77733	0.745589	0.864603	0.873169	0.982924	0.346396	0.96388	0.936	0.944578	0.962366	0.948289	0.970459	0.962958	0.946296
Subtotal	101.049	97.2881	97.3806	101.503	100.481	100.718	100.261	100.166	100.61	100.484	99.9618	101.013	101.767	100.947	101.149	99.7886	100.92	100.568	100.886	100.429	101.618	102.112	100.415	100.407	100.363	99.3456	101.507	100.578	100.289	101.783	100.76	101.22	101.176	96.119	100.048	99.8169	100.162	100.326	99.8809	100.109	99.7621	100.013
O=F,Cl	0.608454	0.499895	0.48883	0.983826	0.874839	0.810196	0.834626	0.759143	0.752485	0.828212	0.733993	0.768741	0.931102	0.903876	0.871045	0.743632	0.804052	0.935281	0.858649	0.808005	0.805138	1.10679	0.811301	0.819248	0.751672	0.763458	0.827672	0.75097	0.875245	0.933973	0.816315	0.816902	0.719968	1.19353	0.717329	0.749843	0.735618	0.717329	0.729522	0.715297	0.711233	0.735618
Total	100.441	96.7882	96.8918	100.519	99.6059	99.9078	99.426	99.4071	99.8574	99.6556	99.2278	100.244	100.836	100.044	100.278	99.045	100.116	99.6324	100.027	99.6209	100.813	101.005	99.6042	99.5877	99.6109	98.5822	100.68	99.8272	99.4133	100.849	99.9435	100.403	100.456	94.9255	99.3302	99.067	99.4261	99.6087	99.1514	99.394	99.0509	99.2778
APFU based on 25 oxygens
P	5.97215	5.99933	6.028	5.92615	5.97797	6.01257	5.9924	5.90946	5.9642	5.93105	5.97473	5.95912	5.98375	5.99069	6.0322	5.97671	5.99258	5.93312	5.96905	5.99137	5.99685	5.93592	6.00399	6.00114	5.9886	6.01077	5.97097	5.96846	5.98831	5.98814	5.99508	6.02241	5.98923	6.03168	6.0982	6.09111	6.09805	6.09481	6.09458	6.09061	6.07763	6.09215
Si	0	0	0	0	0	0	0	0	0	0	0	0	0	0	0	0	0	0	0	0	0	0	0	0	0	0	0	0	0	0	0	0	0	0	0	0	0	0	0	0	0	0
Al	0	0	0	0	0	0	0	0	0	0	0	0	0	0	0	0	0	0	0	0	0	0	0	0	0	0	0	0	0	0	0	0	0	0	0	0	0	0	0	0	0	0
Ti	0	0	0	0	0	0	0	0	0	0	0	0	0	0	0	0	0	0	0	0	0	0	0	0	0	0	0	0	0	0	0	0	0	0	0	0	0	0	0	0	0	0
Fe	0.00210682	0.00536968	0.00202827	0.00267509	0.0028259	0.0387046	0.00169683	0	0.0056538	0.0110836	0.00766689	0.00337748	0.00530372	0.00662661	0.00181566	0.00842008	0.000561509	0.00255405	0.0047956	0.0146014	0	0.00139819	0.00310382	0.00225717	0.00366722	0.00356156	0.000139868	0.00423343	0.0155039	0.00362741	0.000140569	0.00447507	0.000559194	0.00548856	0.0183997	0.00422525	0.0169719	0.0184154	0.00850109	0.00423582	0.00995125	0.00423887
Mn	0.366738	0.211075	0.305062	0.305023	0.185754	0.50847	0.187614	0.0883042	0.332556	0.383546	0.257547	0.2768	0.197765	0.387703	0.109771	0.490293	0.170329	0.270179	0.311713	0.48013	0.0353566	0.179849	0.213625	0.181032	0.139999	0.210952	0.204277	0.224105	0.539223	0.206306	0.159172	0.242062	0.118795	0.372451	0.683786	0.148354	0.697613	0.916799	0.624235	0.543419	0.705523	0.516621
Mg	0	0	0	0	0	0	0	0	0	0	0	0	0	0	0	0	0	0	0	0	0	0	0	0	0	0	0	0	0	0	0	0	0	0	0	0	0	0	0	0	0	0
Zn	0	0	0	0	0	0	0	0	0	0	0	0	0	0	0	0	0	0	0	0	0	0	0	0	0	0	0	0	0	0	0	0	0	0	0	0	0	0	0	0	0	0
Ca	9.69868	9.78103	9.62106	9.874	9.86584	9.42074	9.82462	10.138	9.74311	9.7751	9.79303	9.81924	9.83205	9.62519	9.80596	9.5595	9.84457	9.89315	9.7589	9.52388	9.97251	9.95771	9.77331	9.80715	9.88483	9.75296	9.86637	9.85051	9.47021	9.81972	9.85299	9.69191	9.90481	9.53307	9.05232	9.61965	9.04029	8.82775	9.13082	9.22581	9.09046	9.24877
Na	0.00423336	0.00841186	0.00369484	0.00587575	0.00131036	0.00131002	0.0101631	0	0.0163853	0.00527121	0.00987534	0.00554671	0.0110022	0.00751842	0.00388577	0	0.00618381	0.0026318	0.0039242	0.00591609	0	0.0424663	0	0.0134101	0	0.0112301	0.00356711	0	0.00857416	0	0	0.0110239	0.00551006	0.0196036	0	0	0	0	0	0	0	0
K	0	0	0	0	0	0	0	0	0	0	0	0	0	0	0	0	0	0	0	0	0	0	0	0	0	0	0	0	0	0	0	0	0	0	0	0	0	0	0	0	0	0
Sr	0	0	0	0	0	0	0	0	0	0	0	0	0	0	0	0	0	0	0	0	0	0	0	0	0	0	0	0	0	0	0	0	0	0	0	0	0	0	0	0	0	0
Ba	0	0	0	0	0	0	0	0	0	0	0	0	0	0	0	0	0	0	0	0	0	0	0	0	0	0	0	0	0	0	0	0	0	0	0	0	0	0	0	0	0	0
Y	0	0	0	0	0	0	0	0	0	0	0	0	0	0	0	0	0	0	0	0	0	0	0	0	0	0	0	0	0	0	0	0	0	0	0	0	0	0	0	0	0	0
Th	0	0	0	0	0	0	0	0	0	0	0	0	0	0	0	0	0	0	0	0	0	0	0	0	0	0	0	0	0	0	0	0	0	0	0	0	0	0	0	0	0	0
U	0	0	0	0	0	0	0	0	0	0	0	0	0	0	0	0	0	0	0	0	0	0	0	0	0	0	0	0	0	0	0	0	0	0	0	0	0	0	0	0	0	0
Cl	0.000569348	0	0.00146818	0.00114145	0.000286377	0	0.000573189	0.00201459	0	0.00172801	0	0	0.00254595	0	0.0011323	0.001157	0.00199162	0.00143793	0.0011435	0.000574642	0.000281885	0.00141693	0.00114379	0.00142963	0	0	0	0.00143005	0.000288286	0.00028277	0.000284906	0	0.00255009	0.0258562	0	0	0	0	0	0	0	0
F	0.766977	0.651577	0.634589	1.24293	1.1099	1.02788	1.05939	0.966133	0.955251	1.05525	0.935958	0.971631	1.16463	1.14457	1.09149	0.951996	1.01174	1.19046	1.08658	1.02818	1.00543	1.38845	1.02686	1.03658	0.952206	0.976842	1.03972	0.950343	1.11782	1.17002	1.03031	1.02603	0.901424	1.56429	0.911852	0.948509	0.934419	0.912633	0.928327	0.907072	0.908094	0.933515
OH*	1.23245	1.34842	1.36394	0.755933	0.889817	0.972121	0.940042	1.03185	1.04475	0.94302	1.06404	1.02837	0.832828	0.855431	0.907375	1.04685	0.986271	0.808101	0.912273	0.971247	0.994293	0.610135	0.971992	0.961994	1.04779	1.02316	0.960281	1.04823	0.881895	0.8297	0.969406	0.973972	1.09603	0.409853	1.08815	1.05149	1.06558	1.08737	1.07167	1.09293	1.09191	1.06649
TOTAL	18.0439	18.0052	17.9598	18.1137	18.0337	17.9818	18.0165	18.1358	18.0619	18.1061	18.0428	18.0641	18.0299	18.0177	17.9536	18.0349	18.0142	18.1016	18.0484	18.0159	18.0047	18.1173	17.994	18.005	18.0171	17.9895	18.0453	18.0473	18.0218	18.0178	18.0074	17.9719	18.0189	17.9623	17.8527	17.8633	17.8529	17.8578	17.8581	17.8641	17.8836	17.8618
Sr	11.3803	13.1251	7.04775	14.5427	20.7309	13.7879	19.2631	23.3799	11.1948	17.8428	16.8586	13.3196	13.9111	13.6756	17.299	13.4216	9.27028	14.1321	16.8143	14.0936	13.8772	11.9721	20.8136	14.319	21.0846	19.5454	16.3353	14.809	16.1349	17.485	19.1083	17.3493	23.0226	12.655	42.58	12.52	10.18	20.18	42.4	21.89	203	35.18
Y	60.0965	62.5269	120.32	86.6507	106.734	42.6392	38.6586	106.171	44.2968	41.4129	48.3768	173.274	99.8642	77.1799	450.165	67.6939	221.92	135.169	117.481	80.0495	62.1831	196.384	64.978	82.9886	76.6292	59.8056	94.2464	61.5479	81.7615	58.1351	67.3111	120.934	80.0872	79.7712	154.8	467	170	30.08	169	–	6.67	1.42
La	108.84	86.3572	253.196	103.301	171.679	67.5861	32.7009	93.0304	68.6869	42.7353	46.0269	164.315	128.887	109.273	202.858	99.4743	276.231	169.75	150.637	108.864	97.0539	213.074	92.1966	109.492	79.9842	67.4319	122.89	56.8034	112.014	63.966	82.508	126.958	80.7423	80.8575	83.17	423.3	286.3	53.01	219.5	0.78	16.14	1.96
Ce	170.788	144.353	504.917	170.043	329.216	102.098	52.0858	190.117	107.968	67.5621	76.3905	350.975	222.562	188.234	577.995	157.81	609.144	359.544	298.082	208.032	165.328	465.084	165.654	186.792	146.026	114.987	244.118	97.9034	222.216	115.866	152.521	275.747	137.351	164.593	148.1	999.7	443.1	63.44	388.7	0.33	19.58	1.81
Pr	14.119	12.5353	47.4295	14.6333	31.4167	8.3256	4.40158	19.4872	9.09944	5.70641	6.56607	36.6121	19.9118	16.0924	73.8339	13.4354	61.8662	36.4877	29.0235	19.5949	14.3746	49.581	14.9179	16.8335	13.4956	10.0821	21.3525	7.89477	20.9519	9.27257	13.3325	27.3812	11.4274	15.8501	13.59	119.5	34.52	4.71	43.81	–	1.97	–
Nd	29.3893	26.8205	101.24	28.0903	67.9419	16.5424	9.57968	48.1668	18.9103	10.9493	13.4226	94.6366	43.0078	36.0044	229.223	30.1472	148.917	96.9482	71.9546	46.4336	31.4992	122.644	32.7761	37.5271	29.9751	21.5858	48.4986	16.4951	47.7138	19.7148	30.1625	69.1888	26.6207	40.3588	32.82	357.2	62.84	10.72	86.16	–	3.02	0.32
Sm	11.1021	11.5649	39.8144	11.4028	28.443	7.15498	3.90215	22.415	7.37794	3.79838	5.26284	43.693	17.3494	14.9774	124.772	11.881	64.4524	37.0102	28.88	18.0819	11.9014	52.5417	12.753	15.8779	11.29	8.47761	19.7394	6.63775	19.9477	7.66373	11.7437	31.3613	10.8173	14.1685	15.43	150.9	20.61	4.4	28.14	–	0.81	0.17
Eu	1.69018	1.08229	2.06569	0.591536	1.63496	0.69899	0.188648	0.581178	0.858186	0.283912	0.276837	1.51721	0.926265	1.29542	1.63852	1.24569	1.94436	1.78194	1.21336	0.757746	1.23758	2.13454	0.814123	1.21718	0.654253	0.531444	1.00901	0.493966	1.24227	0.793028	0.480505	1.2538	0.355101	0.826795	2.28	2.59	0.39	0.23	0.42	–	–	–
Gd	7.32538	7.86083	25.497	8.04366	19.8313	4.47195	2.56016	16.5228	5.01808	3.07376	4.00617	31.4913	13.1673	9.49202	104.231	7.59926	45.2147	28.0634	20.7162	12.5227	8.26024	39.539	8.58066	11.3253	7.84061	5.81625	14.7163	4.82824	12.1872	5.48797	8.4795	21.6553	7.6699	10.7122	13	106.7	16.32	3.89	19.58	–	0.57	–
Tb	1.84044	2.03669	5.77676	2.10212	4.51777	1.20659	0.788802	3.93701	1.33127	0.840677	1.13698	7.52929	3.09058	2.36671	25.0292	2.01217	10.9914	5.87522	4.855	3.06911	1.94162	9.31218	2.22041	3.00276	2.18549	1.63016	3.82448	1.23746	2.886	1.41131	2.20226	5.08523	2.11093	2.34655	3.64	22.55	4.51	1.02	6.4	–	0.2	–
Dy	9.46215	9.98904	23.8312	12.1659	20.1644	6.14111	4.73236	18.7636	6.86971	5.25051	6.57189	33.8655	15.9347	12.2801	103.789	10.2025	45.5404	25.9565	21.9549	14.2632	10.1407	39.9355	10.692	14.1544	11.7983	8.35284	15.741	7.3975	13.3606	7.58034	12.1469	24.1455	11.7206	13.398	21.63	95.27	23.98	4.69	32.95	–	0.9	–
Ho	1.01177	1.10125	1.78708	1.60474	1.77484	0.717032	0.618825	2.00052	0.72542	0.726109	0.827267	3.06171	1.69467	1.22929	8.73057	1.05211	3.45082	2.42628	2.10788	1.26928	1.04588	3.49414	1.13215	1.42976	1.36525	0.999379	1.50001	0.931968	1.32465	1.00894	1.21997	2.18473	1.37055	1.51224	2.72	9.07	2.46	0.54	3.23	–	0.19	–
Er	2.22981	2.32433	2.61483	3.59289	3.34179	1.61999	1.75555	3.75988	1.51641	1.66823	1.98308	5.58227	3.1218	2.90479	12.358	2.61959	4.79945	4.6744	4.01098	2.44697	2.15473	6.08939	2.37481	2.80923	2.79605	2.35465	2.99809	2.44639	2.67525	2.4842	2.62249	3.58229	3.17448	2.82959	6.39	17.43	5.35	1.02	7.16	–	0.46	–
Tm	0.317436	0.327825	0.3201	0.630307	0.463065	0.269293	0.357519	0.491656	0.261668	0.327574	0.436706	0.687111	0.521906	0.4121	1.26438	0.318539	0.539646	0.60771	0.55101	0.336988	0.294361	0.707808	0.386564	0.417523	0.451001	0.419399	0.427338	0.421088	0.36443	0.498974	0.423431	0.459599	0.528348	0.416872	1.11	2.77	1.01	0.19	1.18	–	0.19	–
Yb	2.18076	2.33978	1.65176	4.55502	2.7347	1.72179	2.79246	3.08508	1.74005	2.52725	3.17307	3.7871	3.03562	2.62422	5.85048	2.13488	2.55563	3.46287	3.44055	1.96302	1.83433	4.15812	2.20868	2.65059	2.60301	2.89243	2.3964	3.45629	2.23774	3.97375	2.83791	2.96568	3.91779	2.77225	8.21	16.51	6.82	1.15	9.31	–	1.49	–
Lu	0.194103	0.198086	0.101644	0.430466	0.244656	0.173121	0.296893	0.247942	0.150287	0.268679	0.326796	0.322246	0.267216	0.214008	0.386877	0.190348	0.159425	0.280575	0.299654	0.130727	0.132341	0.325905	0.190913	0.232239	0.26253	0.244365	0.215392	0.384306	0.18201	0.437304	0.259432	0.24523	0.361863	0.138283	0.88	1.55	0.76	0.16	0.96	–	0.28	–
Pb	39.5861	37.5442	44.0498	42.3832	44.8752	42.0582	51.0176	12.6609	37.3479	36.4992	39.1537	34.925	40.4244	31.9599	29.7431	38.4276	50.3028	38.8525	35.3712	36.0152	27.6403	41.4959	26.7639	40.5759	21.9075	30.028	41.726	56.5389	51.5885	40.66	38.3268	31.9357	35.2709	226.762	92.45	21.62	35.88	60.06	227.4	144	95.32	274.3
Th	62.3276	47.255	65.3095	34.6401	15.5657	55.6209	64.549	12.7488	68.2199	47.0218	53.6322	35.048	56.0336	53.559	21.1756	53.0143	43.1185	36.1569	23.9758	42.0424	31.0552	36.6754	28.7444	57.8337	12.5595	26.1142	39.8015	30.4208	30.375	28.299	39.2418	27.9616	17.9599	50.4571	70.97	26.05	35.85	86.47	112.1	210.2	160.2	121.4
U	109.554	71.3496	164.556	68.1316	15.8394	63.8826	83.362	8.53176	79.7994	49.2163	66.2637	74.1981	76.7701	85.7113	33.0187	78.0523	144.522	78.7682	42.597	53.2717	52.4238	93.8707	44.2905	106.541	18.8971	57.5036	61.6132	42.3387	56.9119	46.5194	58.467	55.195	30.5326	74.545	133.8	57.03	39.71	66.36	130.5	145.5	171	38.54
Sum REE	360.49	308.891	1010.24	361.188	683.403	218.727	116.761	422.606	230.513	145.718	166.408	778.076	473.478	397.4	1471.96	340.123	1275.81	772.869	637.726	437.766	347.199	1008.62	346.898	403.762	310.727	245.805	499.426	207.332	459.304	240.159	320.94	592.214	298.168	350.78	353	2325	908.8	148.9	708.9	1.07	40.17	4.05
Y/Ho	59.3972	56.7779	67.3278	53.9968	60.1372	59.4662	62.4709	53.0716	61.0637	57.034	58.4779	56.5939	58.9285	62.7841	51.562	64.341	64.3094	55.7106	55.7344	63.0668	59.4555	56.2037	57.3937	58.0437	56.1282	59.8427	62.8305	66.0408	61.7229	57.6197	55.1742	55.3541	58.4345	52.7505	57.17	53.26	89.1	66.2	75.93	–	82.09	–
Th/U	0.568921	0.662301	0.396884	0.50843	0.98272	0.870674	0.774321	1.49428	0.854892	0.955411	0.809376	0.472357	0.729888	0.624877	0.641322	0.679215	0.298353	0.45903	0.562852	0.789207	0.592386	0.390701	0.648996	0.542831	0.664625	0.454131	0.64599	0.71851	0.533719	0.608326	0.671179	0.506596	0.58822	0.676867	0.72	0.65	1.05	1.95	1.8	1.77	1.01	5.13
Eu/Eu*	0.57298	0.347024	0.198209	0.188831	0.210459	0.377782	0.182469	0.0923257	0.43119	0.254023	0.18432	0.125045	0.187356	0.332151	0.0439258	0.400793	0.110114	0.169038	0.151656	0.153949	0.381596	0.143174	0.237929	0.277496	0.212593	0.231378	0.180989	0.266757	0.24358	0.37384	0.147209	0.147086	0.119185	0.205173	0.492157	0.0624017	0.0650113	0.169961	0.0547022	#VALUE!	#VALUE!	#VALUE!
(La/Yb)N	35.7998	26.4742	109.954	16.2673	45.0306	28.1564	8.39989	21.6301	28.3147	12.1294	10.4048	31.1222	30.4553	29.8684	24.8714	33.4225	77.5307	35.1621	31.4053	39.7796	37.9521	36.7565	29.9422	29.6306	22.0408	16.7226	36.7839	11.7887	35.9058	11.5465	20.8544	30.7069	14.783	20.9213	7.26648	18.3908	30.1119	33.0644	16.9116	#VALUE!	7.76994	#VALUE!
Sr/Eu	6.73316	12.1273	3.41181	24.5846	12.6798	19.7255	102.111	40.2285	13.0448	62.846	60.8972	8.77904	15.0185	10.5569	10.5577	10.7744	4.76778	7.93072	13.8577	18.5993	11.2131	5.60875	25.5656	11.7641	32.2271	36.7779	16.1895	29.9797	12.9882	22.0483	39.7671	13.8374	64.8339	15.3061	18.6754	4.83398	26.1026	87.7391	100.952	#VALUE!	#VALUE!	#VALUE!
(La/Lu)N	60.0953	46.723	266.969	25.7189	75.2049	41.8401	11.8044	40.2124	48.9821	17.0466	15.0945	54.648	51.6929	54.7227	56.1959	56.0076	185.695	64.8406	53.8761	89.2493	78.5965	70.0689	51.7565	50.5281	32.652	29.5741	61.1465	15.841	65.9575	15.6766	34.0845	55.4845	23.9135	62.6665	10.1291	29.2686	40.3732	35.5078	24.5047	#VALUE!	6.17776	#VALUE!

## Sheet: Sheet1
	KTH1-01	KTH1-02	KTH1-03	KTH1-04	KTH1-05	KTH1-06	KTH1-07	KTH1-08	KTH1-09	KTH1-10	KTH1-11	KTH1-12	KTH1-13	KTH1-14	KTH1-15	KTH1-16	KTH1-17	KTH1-18	KTH1-19	KTH1-20	KTH1-21	KTH1-22	KTH1-23	KTH1-24	KTH1-25	KTH1-26	KTH1-27	KTH1-28	KTH1-29	KTH1-30	KTH1-31	KTH1-32	KTH1-33
F	3.722	3.695	4.082	4.035	4.024	4.061	3.961	3.887	4.33	3.711	4.271	3.885	3.829	4.112	4.087	3.881	4.24	4.053	3.829	5.01	3.91	3.796	4.863	4.041	4.076	4.186	3.888	4.031	4.903	4.057	4.246	4.213	4.022
Na2O	-	0.006	-	-	0.005	0.019	0.013	-	-	-	0.008	0.015	-	-	-	-	0.005	0.017	0.022	0.001	0.001	-	0.007	0.024	-	0.004	0.054	0.008	0.004	0.02	0.018	0.048	0.026
MgO	0.019	0.019	0.003	-	-	-	0.032	-	-	0.025	0.002	-	0.001	0.011	0.006	-	-	0.006	0.005	0.01	0.001	-	0.01	0.022	-	0.012	0.018	0.007	-	0.01	0.004	-	-
SiO2	-	-	-	-	-	-	-	-	-	-	-	-	-	-	-	-	-	-	-	-	-	-	-	-	-	-	-	-	-	-	-	-	-
Cl	-	0.008	0.01	-	0.006	0.003	-	0.002	-	0.001	0.003	0.005	0.004	0.004	0.001	0.001	0.001	-	0.002	-	-	0.003	0.003	-	-	-	0.003	0.005	0.002	0.004	-	0.001	-
SO3	0.005	-	0.001	0.013	0.012	0.003	-	0.017	-	-	-	-	0.006	-	0.01	0.009	-	0.011	-	0.004	0.001	-	-	-	0.002	0.009	0.001	-	0.015	-	0.014	0.022	-
P2O5	41.48	41.989	42.157	41.779	41.377	41.837	42.083	42.356	42.077	41.802	41.974	41.661	42.27	41.357	42.111	41.865	42.333	41.841	41.541	42.489	42.767	41.019	41.97	41.604	41.791	41.703	42.088	41.845	41.411	42.118	42.173	41.439	41.148
FeO	0.061	0.153	0.031	0.008	0.031	0.026	0.009	0.002	0.012	0.043	0.017	0.024	0.119	0.014	0.038	0.043	0.048	0.09	0.046	0.026	0.005	0.019	0.022	0.12	0.029	-	0.005	0.023	0.026	0.019	0.004	0.022	0.028
MnO	4.066	3.366	0.633	1.298	1.335	1.616	1.122	0.726	0.857	1.189	2.232	3.311	3.177	1.369	1.547	3.701	2.15	3.469	2.025	1.345	1.146	0.752	2.007	3.384	1.862	1.342	1.048	1.27	2.07	1.204	1.265	2.42	1.477
CaO	51.34	51.865	55.021	54.096	54.446	54.138	54.526	55.777	55.151	55.306	53.703	52.92	53.314	55.023	54.348	52.801	53.903	51.918	53.364	55.057	55.283	54.879	54.025	52.872	54.007	54.505	54.678	54.02	53.965	54.393	55.259	52.932	54.603
----------------------------------------------------------
Total	99.126	99.543	100.217	99.53	99.541	99.992	100.078	101.13	100.604	100.514	100.411	100.184	101.107	100.158	100.427	100.667	100.895	99.698	99.222	101.833	101.468	98.869	100.858	100.366	100.051	99.998	100.145	99.511	100.332	100.116	101.195	99.323	99.611
	KTH2-01	KTH2-02	KTH2-03	KTH2-04	KTH2-05	KTH2-06	KTH2-07	KTH2-08	KTH2-09	KTH2-10	KTH2-11	KTH2-12	KTH2-13	KTH2-14	KTH2-15	KTH2-16	KTH2-17	KTH2-18	KTH2-19	KTH2-20	KTH2-21	KTH2-22	KTH2-23	KTH2-24	KTH2-25	KTH2-26	KTH2-27	KTH2-28	KTH2-29	KTH2-30	KTH2-31	KTH2-32	KTH2-33	KTH2-34	KTH2-35	KTH2-36	KTH2-37
F	2.992	2.46		2.4		4.837	4.304	3.987	4.105	3.728	3.703	4.069	3.612	3.783	4.572	4.448	4.282	3.655	3.949		4.597	4.221	3.974	3.961	5.441	3.988	4.026	3.699	3.757	4.073	3.69	4.306	4.595	4.016	4.02	3.533	5.778
Na2O	0.013	0.025		0.011		0.018	0.004	0.004	0.031	0	0.05	0.016	0.03	0.017	0.034	0.023	0.012	0	0.019		0.008	0.012	0.018	0	0.131	0	0.041	0	0.034	0.011	0	0.026	0	0	0.034	0.017	0.057
MgO	0.021	0		0.022		0	0.024	0.028	0	0	0.006	0	0	0	0.01	0	0.02	0	0		0.009	0.009	0	0	0.01	0.006	0	0.002	0	0	0	0.002	0	0	0.011	0.006	0.002
SiO2	0	0		0		0	0	0	0	0	0	0	0	0	0	0	0	0	0		0	0	0	0	0	0	0	0	0	0	0	0	0	0	0	0	0
Cl	0.002	0		0.005		0.004	0.001	0	0.002	0.007	0	0.006	0	0	0.009	0	0.004	0.004	0.007		0.005	0.004	0.002	0.001	0.005	0.004	0.005	0	0	0	0.005	0.001	0.001	0.001	0	0.009	0.086
SO3	0	0		0.01		0.011	0.008	0	0	0.011	0.005	0.006	0	0	0.006	0.01	0.014	0	0.002		0	0.008	0.013	0	0.031	0.002	0.002	0	0	0	0.009	0	0.005	0.009	0.013	0.005	0.016
P2O5	42.001	40.834		41.1		41.577	41.792	42.045	41.861	41.109	41.681	41.23	41.568	41.828	42.349	41.971	42.663	41.368	42.168		41.304	41.803	41.748	42.592	41.936	42.037	42.02	41.94	41.677	42.169	41.779	41.587	42.397	42.128	42.539	42.319	40.165
FeO	0.015	0.037		0.014		0.019	0.02	0.274	0.012	0	0.04	0.078	0.054	0.024	0.038	0.047	0.013	0.059	0.004		0.018	0.034	0.103	0	0.01	0.022	0.016	0.026	0.025	0.001	0.03	0.109	0.026	0.001	0.032	0.004	0.037
MnO	2.578	1.436		2.079		2.139	1.298	3.554	1.31	0.614	2.323	2.665	1.791	1.942	1.399	2.715	0.776	3.392	1.198		1.88	2.182	3.344	0.251	1.27	1.495	1.267	0.98	1.462	1.442	1.568	3.743	1.46	1.118	1.709	0.839	2.479
CaO	53.896	52.604		51.833		54.738	54.499	52.054	54.23	55.726	53.802	53.693	53.836	54.46	54.983	53.284	54.8	52.282	54.737		54.42	54.003	52.437	55.966	55.587	54.069	54.26	54.7	53.434	55.058	54.484	51.967	54.936	54.709	54.093	55.3	50.16
----------------------------------------------------------
Total	100.258	96.36		96.462		101.305	100.138	100.267	99.822	99.624	100.051	100.048	99.37	100.461	101.473	100.625	100.78	99.22	100.42		100.304	100.498	99.965	101.103	102.129	99.943	99.941	99.79	98.807	101.039	100.01	99.928	101.485	100.291	100.758	100.542	96.328

## Sheet: Sheet2
	Ball-like granite																																		I				II				III		IV
	KTH2-01	KTH2-02	KTH2-04	KTH2-06	KTH2-07	KTH2-08	KTH2-09	KTH2-10	KTH2-11	KTH2-12	KTH2-13	KTH2-14	KTH2-15	KTH2-16	KTH2-17	KTH2-18	KTH2-19	KTH2-21	KTH2-22	KTH2-23	KTH2-24	KTH2-25	KTH2-26	KTH2-27	KTH2-28	KTH2-29	KTH2-30	KTH2-31	KTH2-32	KTH2-33	KTH2-34	KTH2-35	KTH2-36	KTH2-37	KH-30	kp03-161	kp03-308	kp03-401	KH-42	kp03-6	kp03-71	kp03-104	kp03-110	kp03-309	HH-44	KH-52	kp03-151	kp03-153	kp03-310
F	2.992	2.46	2.4	4.837	4.304	3.987	4.105	3.728	3.703	4.069	3.612	3.783	4.572	4.448	4.282	3.655	3.949	4.597	4.221	3.974	3.961	5.441	3.988	4.026	3.699	3.757	4.073	3.69	4.306	4.595	4.016	4.02	3.533	5.778	3.53				3.69						3.62	3.53
Na2O	0.013	0.025	0.011	0.018	0.004	0.004	0.031	0	0.05	0.016	0.03	0.017	0.034	0.023	0.012	0	0.019	0.008	0.012	0.018	0	0.131	0	0.041	0	0.034	0.011	0	0.026	0	0	0.034	0.017	0.057
MgO	0.021	0	0.022	0	0.024	0.028	0	0	0.006	0	0	0	0.01	0	0.02	0	0	0.009	0.009	0	0	0.01	0.006	0	0.002	0	0	0	0.002	0	0	0.011	0.006	0.002
SiO2	0	0	0	0	0	0	0	0	0	0	0	0	0	0	0	0	0	0	0	0	0	0	0	0	0	0	0	0	0	0	0	0	0	0
Cl	0.002	0	0.005	0.004	0.001	0	0.002	0.007	0	0.006	0	0	0.009	0	0.004	0.004	0.007	0.005	0.004	0.002	0.001	0.005	0.004	0.005	0	0	0	0.005	0.001	0.001	0.001	0	0.009	0.086
SO3	0	0	0.01	0.011	0.008	0	0	0.011	0.005	0.006	0	0	0.006	0.01	0.014	0	0.002	0	0.008	0.013	0	0.031	0.002	0.002	0	0	0	0.009	0	0.005	0.009	0.013	0.005	0.016
P2O5	42.001	40.834	41.1	41.577	41.792	42.045	41.861	41.109	41.681	41.23	41.568	41.828	42.349	41.971	42.663	41.368	42.168	41.304	41.803	41.748	42.592	41.936	42.037	42.02	41.94	41.677	42.169	41.779	41.587	42.397	42.128	42.539	42.319	40.165	42.56				42.72						42.59	42.5
FeO	0.015	0.037	0.014	0.019	0.02	0.274	0.012	0	0.04	0.078	0.054	0.024	0.038	0.047	0.013	0.059	0.004	0.018	0.034	0.103	0	0.01	0.022	0.016	0.026	0.025	0.001	0.03	0.109	0.026	0.001	0.032	0.004	0.037	0.13				0.03						0.12	0.13
MnO	2.578	1.436	2.079	2.139	1.298	3.554	1.31	0.614	2.323	2.665	1.791	1.942	1.399	2.715	0.776	3.392	1.198	1.88	2.182	3.344	0.251	1.27	1.495	1.267	0.98	1.462	1.442	1.568	3.743	1.46	1.118	1.709	0.839	2.479	4.77				1.04						4.87	6.39
CaO	53.896	52.604	51.833	54.738	54.499	52.054	54.23	55.726	53.802	53.693	53.836	54.46	54.983	53.284	54.8	52.282	54.737	54.42	54.003	52.437	55.966	55.587	54.069	54.26	54.7	53.434	55.058	54.484	51.967	54.936	54.709	54.093	55.3	50.16	49.92				53.31						49.89	48.64
----------------------------------------------------------
Total	100.258	96.36	96.462	101.305	100.138	100.267	99.822	99.624	100.051	100.048	99.37	100.461	101.473	100.625	100.78	99.22	100.42	100.304	100.498	99.965	101.103	102.129	99.943	99.941	99.79	98.807	101.039	100.01	99.928	101.485	100.291	100.758	100.542	96.328
Sr	11.3803	13.1251	7.04775	14.5427	20.7309	13.7879	19.2631	23.3799	11.1948	17.8428	16.8586	13.3196	13.9111	13.6756	17.299	13.4216	9.27028	14.1321	16.8143	14.0936	13.8772	11.9721	20.8136	14.319	21.0846	19.5454	16.3353	14.809	16.1349	17.485	19.1083	17.3493	23.0226	12.655	42.58	308.57	11.23	14.59	12.52	6.46	11.62	8.15	11.65	13.45	10.18	20.18	42.49	10.53	14.23
Y	60.0965	62.5269	120.32	86.6507	106.734	42.6392	38.6586	106.171	44.2968	41.4129	48.3768	173.274	99.8642	77.1799	450.165	67.6939	221.92	135.169	117.481	80.0495	62.1831	196.384	64.978	82.9886	76.6292	59.8056	94.2464	61.5479	81.7615	58.1351	67.3111	120.934	80.0872	79.7712	154.8	114.91	672.94	528.54	467	185.72	172.99	203.98	34.23	599.97	170	30.08	3.87	113.77	25.44
La	108.84	86.3572	253.196	103.301	171.679	67.5861	32.7009	93.0304	68.6869	42.7353	46.0269	164.315	128.887	109.273	202.858	99.4743	276.231	169.75	150.637	108.864	97.0539	213.074	92.1966	109.492	79.9842	67.4319	122.89	56.8034	112.014	63.966	82.508	126.958	80.7423	80.8575	83.17	72.83	395.14	390.66	423.3	333.39	368.32	404.07	177.96	440.86	286.3	53.01	4.27	361.81	116.9
Ce	170.788	144.353	504.917	170.043	329.216	102.098	52.0858	190.117	107.968	67.5621	76.3905	350.975	222.562	188.234	577.995	157.81	609.144	359.544	298.082	208.032	165.328	465.084	165.654	186.792	146.026	114.987	244.118	97.9034	222.216	115.866	152.521	275.747	137.351	164.593	148.1	119.64	1057.11	1028.5	999.7	562	555.65	626.27	137.65	1041.06	443.1	63.44	5.73	373.79	92.07
Pr	14.119	12.5353	47.4295	14.6333	31.4167	8.3256	4.40158	19.4872	9.09944	5.70641	6.56607	36.6121	19.9118	16.0924	73.8339	13.4354	61.8662	36.4877	29.0235	19.5949	14.3746	49.581	14.9179	16.8335	13.4956	10.0821	21.3525	7.89477	20.9519	9.27257	13.3325	27.3812	11.4274	15.8501	13.59	10.27	115.86	108.58	119.5	41.47	38.53	45.15	6.75	99.5	34.52	4.71	0.32	28.07	4.91
Nd	29.3893	26.8205	101.24	28.0903	67.9419	16.5424	9.57968	48.1668	18.9103	10.9493	13.4226	94.6366	43.0078	36.0044	229.223	30.1472	148.917	96.9482	71.9546	46.4336	31.4992	122.644	32.7761	37.5271	29.9751	21.5858	48.4986	16.4951	47.7138	19.7148	30.1625	69.1888	26.6207	40.3588	32.82	25.67	315.98	272.65	357.2	71.8	61.89	73.11	14.12	242.59	62.84	10.72	0.39	43.62	8.64
Sm	11.1021	11.5649	39.8144	11.4028	28.443	7.15498	3.90215	22.415	7.37794	3.79838	5.26284	43.693	17.3494	14.9774	124.772	11.881	64.4524	37.0102	28.88	18.0819	11.9014	52.5417	12.753	15.8779	11.29	8.47761	19.7394	6.63775	19.9477	7.66373	11.7437	31.3613	10.8173	14.1685	15.43	8.95	140.93	127.51	150.9	20.74	16.8	20.74	4.08	94.8	20.61	4.4	0.21	11.91	3.42
Eu	1.69018	1.08229	2.06569	0.591536	1.63496	0.69899	0.188648	0.581178	0.858186	0.283912	0.276837	1.51721	0.926265	1.29542	1.63852	1.24569	1.94436	1.78194	1.21336	0.757746	1.23758	2.13454	0.814123	1.21718	0.654253	0.531444	1.00901	0.493966	1.24227	0.793028	0.480505	1.2538	0.355101	0.826795	2.28	2.77	1.51	1.68	2.59	0.39	0.25	0.35	0.33	1.22	0.39	0.23	0	0.32	0.21
Gd	7.32538	7.86083	25.497	8.04366	19.8313	4.47195	2.56016	16.5228	5.01808	3.07376	4.00617	31.4913	13.1673	9.49202	104.231	7.59926	45.2147	28.0634	20.7162	12.5227	8.26024	39.539	8.58066	11.3253	7.84061	5.81625	14.7163	4.82824	12.1872	5.48797	8.4795	21.6553	7.6699	10.7122	13	7.07	114.37	95.33	106.7	13.8	12.54	14.26	3.42	71.91	16.32	3.89	0.22	9.53	2.82
Tb	1.84044	2.03669	5.77676	2.10212	4.51777	1.20659	0.788802	3.93701	1.33127	0.840677	1.13698	7.52929	3.09058	2.36671	25.0292	2.01217	10.9914	5.87522	4.855	3.06911	1.94162	9.31218	2.22041	3.00276	2.18549	1.63016	3.82448	1.23746	2.886	1.41131	2.20226	5.08523	2.11093	2.34655	3.64	2.37	34.23	25.55	22.55	4.81	4.38	5.08	1.02	23.01	4.51	1.02	0.1	2.98	0.83
Dy	9.46215	9.98904	23.8312	12.1659	20.1644	6.14111	4.73236	18.7636	6.86971	5.25051	6.57189	33.8655	15.9347	12.2801	103.789	10.2025	45.5404	25.9565	21.9549	14.2632	10.1407	39.9355	10.692	14.1544	11.7983	8.35284	15.741	7.3975	13.3606	7.58034	12.1469	24.1455	11.7206	13.398	21.63	13.72	141.3	118.17	95.27	24.13	21.71	25.66	4.82	100.73	23.98	4.69	0.51	13.88	3.86
Ho	1.01177	1.10125	1.78708	1.60474	1.77484	0.717032	0.618825	2.00052	0.72542	0.726109	0.827267	3.06171	1.69467	1.22929	8.73057	1.05211	3.45082	2.42628	2.10788	1.26928	1.04588	3.49414	1.13215	1.42976	1.36525	0.999379	1.50001	0.931968	1.32465	1.00894	1.21997	2.18473	1.37055	1.51224	2.72	1.99	11.57	11.02	9.07	2.39	2.16	2.52	0.46	9	2.46	0.54	0.05	1.35	0.41
Er	2.22981	2.32433	2.61483	3.59289	3.34179	1.61999	1.75555	3.75988	1.51641	1.66823	1.98308	5.58227	3.1218	2.90479	12.358	2.61959	4.79945	4.6744	4.01098	2.44697	2.15473	6.08939	2.37481	2.80923	2.79605	2.35465	2.99809	2.44639	2.67525	2.4842	2.62249	3.58229	3.17448	2.82959	6.39	6.19	19.72	18.17	17.43	5.52	4.99	6.01	0.95	18.17	5.35	1.02	0.1	2.99	0.74
Tm	0.317436	0.327825	0.3201	0.630307	0.463065	0.269293	0.357519	0.491656	0.261668	0.327574	0.436706	0.687111	0.521906	0.4121	1.26438	0.318539	0.539646	0.60771	0.55101	0.336988	0.294361	0.707808	0.386564	0.417523	0.451001	0.419399	0.427338	0.421088	0.36443	0.498974	0.423431	0.459599	0.528348	0.416872	1.11	1.55	2.42	2.52	2.77	1.06	0.94	1.09	0.15	2.81	1.01	0.19	0.03	0.55	0.12
Yb	2.18076	2.33978	1.65176	4.55502	2.7347	1.72179	2.79246	3.08508	1.74005	2.52725	3.17307	3.7871	3.03562	2.62422	5.85048	2.13488	2.55563	3.46287	3.44055	1.96302	1.83433	4.15812	2.20868	2.65059	2.60301	2.89243	2.3964	3.45629	2.23774	3.97375	2.83791	2.96568	3.91779	2.77225	8.21	15.53	14.09	15.02	16.51	7.99	6.9	9	1.05	17.96	6.82	1.15	0.2	3.93	0.72
Lu	0.194103	0.198086	0.101644	0.430466	0.244656	0.173121	0.296893	0.247942	0.150287	0.268679	0.326796	0.322246	0.267216	0.214008	0.386877	0.190348	0.159425	0.280575	0.299654	0.130727	0.132341	0.325905	0.190913	0.232239	0.26253	0.244365	0.215392	0.384306	0.18201	0.437304	0.259432	0.24523	0.361863	0.138283	0.88	2.17	1.26	1.42	1.55	0.83	0.7	0.87	0.09	1.78	0.76	0.16	0.02	0.35	0.08
Pb	39.5861	37.5442	44.0498	42.3832	44.8752	42.0582	51.0176	12.6609	37.3479	36.4992	39.1537	34.925	40.4244	31.9599	29.7431	38.4276	50.3028	38.8525	35.3712	36.0152	27.6403	41.4959	26.7639	40.5759	21.9075	30.028	41.726	56.5389	51.5885	40.66	38.3268	31.9357	35.2709	226.762	92.45				21.62						35.88	60.06
Th	62.3276	47.255	65.3095	34.6401	15.5657	55.6209	64.549	12.7488	68.2199	47.0218	53.6322	35.048	56.0336	53.559	21.1756	53.0143	43.1185	36.1569	23.9758	42.0424	31.0552	36.6754	28.7444	57.8337	12.5595	26.1142	39.8015	30.4208	30.375	28.299	39.2418	27.9616	17.9599	50.4571	70.97				26.05						35.85	86.47
U	109.554	71.3496	164.556	68.1316	15.8394	63.8826	83.362	8.53176	79.7994	49.2163	66.2637	74.1981	76.7701	85.7113	33.0187	78.0523	144.522	78.7682	42.597	53.2717	52.4238	93.8707	44.2905	106.541	18.8971	57.5036	61.6132	42.3387	56.9119	46.5194	58.467	55.195	30.5326	74.545	133.8				57.03						39.71	66.36
Sum REE	360.49	308.891	1010.24	361.188	683.403	218.727	116.761	422.606	230.513	145.718	166.408	778.076	473.478	397.4	1471.96	340.123	1275.81	772.869	637.726	437.766	347.199	1008.62	346.898	403.762	310.727	245.805	499.426	207.332	459.304	240.159	320.94	592.214	298.168	350.78	353	405.61	3038.43	2745.32	2325	1276.02	1268.75	1438.13	387.07	2765.36	908.8	148.9	16.02	968.84	261.16
Y/Ho	59.3972	56.7779	67.3278	53.9968	60.1372	59.4662	62.4709	53.0716	61.0637	57.034	58.4779	56.5939	58.9285	62.7841	51.562	64.341	64.3094	55.7106	55.7344	63.0668	59.4555	56.2037	57.3937	58.0437	56.1282	59.8427	62.8305	66.0408	61.7229	57.6197	55.1742	55.3541	58.4345	52.7505	57.17	57.7	58.2	48	53.26	77.7	80.1	80.9	74.4	66.7	89.1	66.2	77.4	84.3	62
Th/U	0.568921	0.662301	0.396884	0.50843	0.98272	0.870674	0.774321	1.49428	0.854892	0.955411	0.809376	0.472357	0.729888	0.624877	0.641322	0.679215	0.298353	0.45903	0.562852	0.789207	0.592386	0.390701	0.648996	0.542831	0.664625	0.454131	0.64599	0.71851	0.533719	0.608326	0.671179	0.506596	0.58822	0.676867	0.72				0.65						1.05	1.95
Eu/Eu*	0.57298	0.347024	0.198209	0.188831	0.210459	0.377782	0.182469	0.0923257	0.43119	0.254023	0.18432	0.125045	0.187356	0.332151	0.0439258	0.400793	0.110114	0.169038	0.151656	0.153949	0.381596	0.143174	0.237929	0.277496	0.212593	0.231378	0.180989	0.266757	0.24358	0.37384	0.147209	0.147086	0.119185	0.205173	0.492157	1.07	0.04	0.05	0.0624017	0.07	0.05	0.06	0.27	0.05	0.0650113	0.169961	0.06	0.09	0.21
(La/Yb)N	35.7998	26.4742	109.954	16.2673	45.0306	28.1564	8.39989	21.6301	28.3147	12.1294	10.4048	31.1222	30.4553	29.8684	24.8714	33.4225	77.5307	35.1621	31.4053	39.7796	37.9521	36.7565	29.9422	29.6306	22.0408	16.7226	36.7839	11.7887	35.9058	11.5465	20.8544	30.7069	14.783	20.9213	7.26648	3.36387	20.116	18.6565	18.3908	29.93	38.2892	32.2044	121.572	17.6074	30.1119	33.0644	15.3143	66.0372	116.462
[truncated: 28 more columns]

## Sheet: Sheet3
	Ball-like granite																																		I				II				III		IV
	KTH2-01	KTH2-02	KTH2-04	KTH2-06	KTH2-07	KTH2-08	KTH2-09	KTH2-10	KTH2-11	KTH2-12	KTH2-13	KTH2-14	KTH2-15	KTH2-16	KTH2-17	KTH2-18	KTH2-19	KTH2-21	KTH2-22	KTH2-23	KTH2-24	KTH2-25	KTH2-26	KTH2-27	KTH2-28	KTH2-29	KTH2-30	KTH2-31	KTH2-32	KTH2-33	KTH2-34	KTH2-35	KTH2-36	KTH2-37	KH-30	kp03-161	kp03-308	kp03-401	KH-42	kp03-6	kp03-71	kp03-104	kp03-110	kp03-309	HH-44	KH-52	kp03-151	kp03-153	kp03-310
F	2.992	2.46	2.4	4.837	4.304	3.987	4.105	3.728	3.703	4.069	3.612	3.783	4.572	4.448	4.282	3.655	3.949	4.597	4.221	3.974	3.961	5.441	3.988	4.026	3.699	3.757	4.073	3.69	4.306	4.595	4.016	4.02	3.533	5.778	3.53				3.69						3.62	3.53
Na2O	0.013	0.025	0.011	0.018	0.004	0.004	0.031	0	0.05	0.016	0.03	0.017	0.034	0.023	0.012	0	0.019	0.008	0.012	0.018	0	0.131	0	0.041	0	0.034	0.011	0	0.026	0	0	0.034	0.017	0.057	0				0						0	0
MgO	0.021	0	0.022	0	0.024	0.028	0	0	0.006	0	0	0	0.01	0	0.02	0	0	0.009	0.009	0	0	0.01	0.006	0	0.002	0	0	0	0.002	0	0	0.011	0.006	0.002	0				0						0	0
SiO2	0	0	0	0	0	0	0	0	0	0	0	0	0	0	0	0	0	0	0	0	0	0	0	0	0	0	0	0	0	0	0	0	0	0	0				0						0	0
Cl	0.002	0	0.005	0.004	0.001	0	0.002	0.007	0	0.006	0	0	0.009	0	0.004	0.004	0.007	0.005	0.004	0.002	0.001	0.005	0.004	0.005	0	0	0	0.005	0.001	0.001	0.001	0	0.009	0.086	0				0						0	0
SO3	0	0	0.01	0.011	0.008	0	0	0.011	0.005	0.006	0	0	0.006	0.01	0.014	0	0.002	0	0.008	0.013	0	0.031	0.002	0.002	0	0	0	0.009	0	0.005	0.009	0.013	0.005	0.016	0				0						0	0
P2O5	42.001	40.834	41.1	41.577	41.792	42.045	41.861	41.109	41.681	41.23	41.568	41.828	42.349	41.971	42.663	41.368	42.168	41.304	41.803	41.748	42.592	41.936	42.037	42.02	41.94	41.677	42.169	41.779	41.587	42.397	42.128	42.539	42.319	40.165	42.56				42.72						42.59	42.5
FeO	0.015	0.037	0.014	0.019	0.02	0.274	0.012	0	0.04	0.078	0.054	0.024	0.038	0.047	0.013	0.059	0.004	0.018	0.034	0.103	0	0.01	0.022	0.016	0.026	0.025	0.001	0.03	0.109	0.026	0.001	0.032	0.004	0.037	0.13				0.03						0.12	0.13
MnO	2.578	1.436	2.079	2.139	1.298	3.554	1.31	0.614	2.323	2.665	1.791	1.942	1.399	2.715	0.776	3.392	1.198	1.88	2.182	3.344	0.251	1.27	1.495	1.267	0.98	1.462	1.442	1.568	3.743	1.46	1.118	1.709	0.839	2.479	4.77				1.04						4.87	6.39
CaO	53.896	52.604	51.833	54.738	54.499	52.054	54.23	55.726	53.802	53.693	53.836	54.46	54.983	53.284	54.8	52.282	54.737	54.42	54.003	52.437	55.966	55.587	54.069	54.26	54.7	53.434	55.058	54.484	51.967	54.936	54.709	54.093	55.3	50.16	49.92				53.31						49.89	48.64
----------------------------------------------------------
Total	100.258	96.36	96.462	101.305	100.138	100.267	99.822	99.624	100.051	100.048	99.37	100.461	101.473	100.625	100.78	99.22	100.42	100.304	100.498	99.965	101.103	102.129	99.943	99.941	99.79	98.807	101.039	100.01	99.928	101.485	100.291	100.758	100.542	96.328
Sr	11.3803	13.1251	7.04775	14.5427	20.7309	13.7879	19.2631	23.3799	11.1948	17.8428	16.8586	13.3196	13.9111	13.6756	17.299	13.4216	9.27028	14.1321	16.8143	14.0936	13.8772	11.9721	20.8136	14.319	21.0846	19.5454	16.3353	14.809	16.1349	17.485	19.1083	17.3493	23.0226	12.655	42.58	308.57	11.23	14.59	12.52	6.46	11.62	8.15	11.65	13.45	10.18	20.18	42.49	10.53	14.23
Y	60.0965	62.5269	120.32	86.6507	106.734	42.6392	38.6586	106.171	44.2968	41.4129	48.3768	173.274	99.8642	77.1799	450.165	67.6939	221.92	135.169	117.481	80.0495	62.1831	196.384	64.978	82.9886	76.6292	59.8056	94.2464	61.5479	81.7615	58.1351	67.3111	120.934	80.0872	79.7712	154.8	114.91	672.94	528.54	467	185.72	172.99	203.98	34.23	599.97	170	30.08	3.87	113.77	25.44
La	108.84	86.3572	253.196	103.301	171.679	67.5861	32.7009	93.0304	68.6869	42.7353	46.0269	164.315	128.887	109.273	202.858	99.4743	276.231	169.75	150.637	108.864	97.0539	213.074	92.1966	109.492	79.9842	67.4319	122.89	56.8034	112.014	63.966	82.508	126.958	80.7423	80.8575	83.17	72.83	395.14	390.66	423.3	333.39	368.32	404.07	177.96	440.86	286.3	53.01	4.27	361.81	116.9
Ce	170.788	144.353	504.917	170.043	329.216	102.098	52.0858	190.117	107.968	67.5621	76.3905	350.975	222.562	188.234	577.995	157.81	609.144	359.544	298.082	208.032	165.328	465.084	165.654	186.792	146.026	114.987	244.118	97.9034	222.216	115.866	152.521	275.747	137.351	164.593	148.1	119.64	1057.11	1028.5	999.7	562	555.65	626.27	137.65	1041.06	443.1	63.44	5.73	373.79	92.07
Pr	14.119	12.5353	47.4295	14.6333	31.4167	8.3256	4.40158	19.4872	9.09944	5.70641	6.56607	36.6121	19.9118	16.0924	73.8339	13.4354	61.8662	36.4877	29.0235	19.5949	14.3746	49.581	14.9179	16.8335	13.4956	10.0821	21.3525	7.89477	20.9519	9.27257	13.3325	27.3812	11.4274	15.8501	13.59	10.27	115.86	108.58	119.5	41.47	38.53	45.15	6.75	99.5	34.52	4.71	0.32	28.07	4.91
Nd	29.3893	26.8205	101.24	28.0903	67.9419	16.5424	9.57968	48.1668	18.9103	10.9493	13.4226	94.6366	43.0078	36.0044	229.223	30.1472	148.917	96.9482	71.9546	46.4336	31.4992	122.644	32.7761	37.5271	29.9751	21.5858	48.4986	16.4951	47.7138	19.7148	30.1625	69.1888	26.6207	40.3588	32.82	25.67	315.98	272.65	357.2	71.8	61.89	73.11	14.12	242.59	62.84	10.72	0.39	43.62	8.64
Sm	11.1021	11.5649	39.8144	11.4028	28.443	7.15498	3.90215	22.415	7.37794	3.79838	5.26284	43.693	17.3494	14.9774	124.772	11.881	64.4524	37.0102	28.88	18.0819	11.9014	52.5417	12.753	15.8779	11.29	8.47761	19.7394	6.63775	19.9477	7.66373	11.7437	31.3613	10.8173	14.1685	15.43	8.95	140.93	127.51	150.9	20.74	16.8	20.74	4.08	94.8	20.61	4.4	0.21	11.91	3.42
Eu	1.69018	1.08229	2.06569	0.591536	1.63496	0.69899	0.188648	0.581178	0.858186	0.283912	0.276837	1.51721	0.926265	1.29542	1.63852	1.24569	1.94436	1.78194	1.21336	0.757746	1.23758	2.13454	0.814123	1.21718	0.654253	0.531444	1.00901	0.493966	1.24227	0.793028	0.480505	1.2538	0.355101	0.826795	2.28	2.77	1.51	1.68	2.59	0.39	0.25	0.35	0.33	1.22	0.39	0.23	0	0.32	0.21
Gd	7.32538	7.86083	25.497	8.04366	19.8313	4.47195	2.56016	16.5228	5.01808	3.07376	4.00617	31.4913	13.1673	9.49202	104.231	7.59926	45.2147	28.0634	20.7162	12.5227	8.26024	39.539	8.58066	11.3253	7.84061	5.81625	14.7163	4.82824	12.1872	5.48797	8.4795	21.6553	7.6699	10.7122	13	7.07	114.37	95.33	106.7	13.8	12.54	14.26	3.42	71.91	16.32	3.89	0.22	9.53	2.82
Tb	1.84044	2.03669	5.77676	2.10212	4.51777	1.20659	0.788802	3.93701	1.33127	0.840677	1.13698	7.52929	3.09058	2.36671	25.0292	2.01217	10.9914	5.87522	4.855	3.06911	1.94162	9.31218	2.22041	3.00276	2.18549	1.63016	3.82448	1.23746	2.886	1.41131	2.20226	5.08523	2.11093	2.34655	3.64	2.37	34.23	25.55	22.55	4.81	4.38	5.08	1.02	23.01	4.51	1.02	0.1	2.98	0.83
Dy	9.46215	9.98904	23.8312	12.1659	20.1644	6.14111	4.73236	18.7636	6.86971	5.25051	6.57189	33.8655	15.9347	12.2801	103.789	10.2025	45.5404	25.9565	21.9549	14.2632	10.1407	39.9355	10.692	14.1544	11.7983	8.35284	15.741	7.3975	13.3606	7.58034	12.1469	24.1455	11.7206	13.398	21.63	13.72	141.3	118.17	95.27	24.13	21.71	25.66	4.82	100.73	23.98	4.69	0.51	13.88	3.86
Ho	1.01177	1.10125	1.78708	1.60474	1.77484	0.717032	0.618825	2.00052	0.72542	0.726109	0.827267	3.06171	1.69467	1.22929	8.73057	1.05211	3.45082	2.42628	2.10788	1.26928	1.04588	3.49414	1.13215	1.42976	1.36525	0.999379	1.50001	0.931968	1.32465	1.00894	1.21997	2.18473	1.37055	1.51224	2.72	1.99	11.57	11.02	9.07	2.39	2.16	2.52	0.46	9	2.46	0.54	0.05	1.35	0.41
Er	2.22981	2.32433	2.61483	3.59289	3.34179	1.61999	1.75555	3.75988	1.51641	1.66823	1.98308	5.58227	3.1218	2.90479	12.358	2.61959	4.79945	4.6744	4.01098	2.44697	2.15473	6.08939	2.37481	2.80923	2.79605	2.35465	2.99809	2.44639	2.67525	2.4842	2.62249	3.58229	3.17448	2.82959	6.39	6.19	19.72	18.17	17.43	5.52	4.99	6.01	0.95	18.17	5.35	1.02	0.1	2.99	0.74
Tm	0.317436	0.327825	0.3201	0.630307	0.463065	0.269293	0.357519	0.491656	0.261668	0.327574	0.436706	0.687111	0.521906	0.4121	1.26438	0.318539	0.539646	0.60771	0.55101	0.336988	0.294361	0.707808	0.386564	0.417523	0.451001	0.419399	0.427338	0.421088	0.36443	0.498974	0.423431	0.459599	0.528348	0.416872	1.11	1.55	2.42	2.52	2.77	1.06	0.94	1.09	0.15	2.81	1.01	0.19	0.03	0.55	0.12
Yb	2.18076	2.33978	1.65176	4.55502	2.7347	1.72179	2.79246	3.08508	1.74005	2.52725	3.17307	3.7871	3.03562	2.62422	5.85048	2.13488	2.55563	3.46287	3.44055	1.96302	1.83433	4.15812	2.20868	2.65059	2.60301	2.89243	2.3964	3.45629	2.23774	3.97375	2.83791	2.96568	3.91779	2.77225	8.21	15.53	14.09	15.02	16.51	7.99	6.9	9	1.05	17.96	6.82	1.15	0.2	3.93	0.72
Lu	0.194103	0.198086	0.101644	0.430466	0.244656	0.173121	0.296893	0.247942	0.150287	0.268679	0.326796	0.322246	0.267216	0.214008	0.386877	0.190348	0.159425	0.280575	0.299654	0.130727	0.132341	0.325905	0.190913	0.232239	0.26253	0.244365	0.215392	0.384306	0.18201	0.437304	0.259432	0.24523	0.361863	0.138283	0.88	2.17	1.26	1.42	1.55	0.83	0.7	0.87	0.09	1.78	0.76	0.16	0.02	0.35	0.08
Pb	39.5861	37.5442	44.0498	42.3832	44.8752	42.0582	51.0176	12.6609	37.3479	36.4992	39.1537	34.925	40.4244	31.9599	29.7431	38.4276	50.3028	38.8525	35.3712	36.0152	27.6403	41.4959	26.7639	40.5759	21.9075	30.028	41.726	56.5389	51.5885	40.66	38.3268	31.9357	35.2709	226.762	92.45				21.62						35.88	60.06
Th	62.3276	47.255	65.3095	34.6401	15.5657	55.6209	64.549	12.7488	68.2199	47.0218	53.6322	35.048	56.0336	53.559	21.1756	53.0143	43.1185	36.1569	23.9758	42.0424	31.0552	36.6754	28.7444	57.8337	12.5595	26.1142	39.8015	30.4208	30.375	28.299	39.2418	27.9616	17.9599	50.4571	70.97				26.05						35.85	86.47
U	109.554	71.3496	164.556	68.1316	15.8394	63.8826	83.362	8.53176	79.7994	49.2163	66.2637	74.1981	76.7701	85.7113	33.0187	78.0523	144.522	78.7682	42.597	53.2717	52.4238	93.8707	44.2905	106.541	18.8971	57.5036	61.6132	42.3387	56.9119	46.5194	58.467	55.195	30.5326	74.545	133.8				57.03						39.71	66.36
Sum REE	360.49	308.891	1010.24	361.188	683.403	218.727	116.761	422.606	230.513	145.718	166.408	778.076	473.478	397.4	1471.96	340.123	1275.81	772.869	637.726	437.766	347.199	1008.62	346.898	403.762	310.727	245.805	499.426	207.332	459.304	240.159	320.94	592.214	298.168	350.78	353	405.61	3038.43	2745.32	2325	1276.02	1268.75	1438.13	387.07	2765.36	908.8	148.9	16.02	968.84	261.16
Y/Ho	59.3972	56.7779	67.3278	53.9968	60.1372	59.4662	62.4709	53.0716	61.0637	57.034	58.4779	56.5939	58.9285	62.7841	51.562	64.341	64.3094	55.7106	55.7344	63.0668	59.4555	56.2037	57.3937	58.0437	56.1282	59.8427	62.8305	66.0408	61.7229	57.6197	55.1742	55.3541	58.4345	52.7505	57.17	57.7	58.2	48	53.26	77.7	80.1	80.9	74.4	66.7	89.1	66.2	77.4	84.3	62
Th/U	0.568921	0.662301	0.396884	0.50843	0.98272	0.870674	0.774321	1.49428	0.854892	0.955411	0.809376	0.472357	0.729888	0.624877	0.641322	0.679215	0.298353	0.45903	0.562852	0.789207	0.592386	0.390701	0.648996	0.542831	0.664625	0.454131	0.64599	0.71851	0.533719	0.608326	0.671179	0.506596	0.58822	0.676867	0.72				0.65						1.05	1.95
Eu/Eu*	0.57298	0.347024	0.198209	0.188831	0.210459	0.377782	0.182469	0.0923257	0.43119	0.254023	0.18432	0.125045	0.187356	0.332151	0.0439258	0.400793	0.110114	0.169038	0.151656	0.153949	0.381596	0.143174	0.237929	0.277496	0.212593	0.231378	0.180989	0.266757	0.24358	0.37384	0.147209	0.147086	0.119185	0.205173	0.492157	1.07	0.04	0.05	0.0624017	0.07	0.05	0.06	0.27	0.05	0.0650113	0.169961	0.06	0.09	0.21
(La/Yb)N	35.7998	26.4742	109.954	16.2673	45.0306	28.1564	8.39989	21.6301	28.3147	12.1294	10.4048	31.1222	30.4553	29.8684	24.8714	33.4225	77.5307	35.1621	31.4053	39.7796	37.9521	36.7565	29.9422	29.6306	22.0408	16.7226	36.7839	11.7887	35.9058	11.5465	20.8544	30.7069	14.783	20.9213	7.26648	3.36387	20.116	18.6565	18.3908	29.93	38.2892	32.2044	121.572	17.6074	30.1119	33.0644	15.3143	66.0372	116.462
Sr/Eu	6.73316	12.1273	3.41181	24.5846	12.6798	19.7255	102.111	40.2285	13.0448	62.846	60.8972	8.77904	15.0185	10.5569	10.5577	10.7744	4.76778	7.93072	13.8577	18.5993	11.2131	5.60875	25.5656	11.7641	32.2271	36.7779	16.1895	29.9797	12.9882	22.0483	39.7671	13.8374	64.8339	15.3061	18.6754	111.397	7.43709	8.68452	4.83398	16.5641	46.48	23.2857	35.303	11.0246	26.1026	87.7391	#DIV/0!	32.9062	67.7619
(La/Lu)N	60.0953	46.723	266.969	25.7189	75.2049	41.8401	11.8044	40.2124	48.9821	17.0466	15.0945	54.648	51.6929	54.7227	56.1959	56.0076	185.695	64.8406	53.8761	89.2493	78.5965	70.0689	51.7565	50.5281	32.652	29.5741	61.1465	15.841	65.9575	15.6766	34.0845	55.4845	23.9135	62.6665	10.1291	3.59696	33.6098	29.4846	29.2686	43.0487	56.3914	49.7763	211.917	26.544	40.3732	35.5078	22.8814	110.789	156.607
																									8.39989
																									10.4048
																									11.5465
																									11.7887
																									12.1294
																									14.783
																									16.2673
																									16.7226
																									20.8544
																									20.9213
																									21.6301
																									22.0408
																									24.8714
																									26.4742
																									28.1564
																									28.3147
																									29.6306
																									29.8684
																									29.9422
																									30.4553
																									30.7069
																									31.1222
																									31.4053
																									33.4225
																									35.1621
																									35.7998
																									35.9058
																									36.7565
																									36.7839
																									37.9521
																									39.7796
																									45.0306
																									77.5307
																									109.954
[truncated: 28 more columns]

## Sheet: Sheet4
	Ball-like granite																																		I	II	IV		V		VI	VIII
	KTH2-01	KTH2-02	KTH2-04	KTH2-06	KTH2-07	KTH2-08	KTH2-09	KTH2-10	KTH2-11	KTH2-12	KTH2-13	KTH2-14	KTH2-15	KTH2-16	KTH2-17	KTH2-18	KTH2-19	KTH2-21	KTH2-22	KTH2-23	KTH2-24	KTH2-25	KTH2-26	KTH2-27	KTH2-28	KTH2-29	KTH2-30	KTH2-31	KTH2-32	KTH2-33	KTH2-34	KTH2-35	KTH2-36	KTH2-37	KH-30	KH-42	HH-44	KH-52	KH-54	KH-53	KH-50	KH-65
F	2.992	2.46	2.4	4.837	4.304	3.987	4.105	3.728	3.703	4.069	3.612	3.783	4.572	4.448	4.282	3.655	3.949	4.597	4.221	3.974	3.961	5.441	3.988	4.026	3.699	3.757	4.073	3.69	4.306	4.595	4.016	4.02	3.533	5.778	3.53	3.69	3.62	3.53	3.59	3.52	3.5	3.62
Na2O	0.013	0.025	0.011	0.018	0.004	0.004	0.031	0	0.05	0.016	0.03	0.017	0.034	0.023	0.012	0	0.019	0.008	0.012	0.018	0	0.131	0	0.041	0	0.034	0.011	0	0.026	0	0	0.034	0.017	0.057	0	0	0	0	0	0	0	0
MgO	0.021	0	0.022	0	0.024	0.028	0	0	0.006	0	0	0	0.01	0	0.02	0	0	0.009	0.009	0	0	0.01	0.006	0	0.002	0	0	0	0.002	0	0	0.011	0.006	0.002	0	0	0	0	0	0	0	0
SiO2	0	0	0	0	0	0	0	0	0	0	0	0	0	0	0	0	0	0	0	0	0	0	0	0	0	0	0	0	0	0	0	0	0	0	0	0	0	0	0	0	0	0
Cl	0.002	0	0.005	0.004	0.001	0	0.002	0.007	0	0.006	0	0	0.009	0	0.004	0.004	0.007	0.005	0.004	0.002	0.001	0.005	0.004	0.005	0	0	0	0.005	0.001	0.001	0.001	0	0.009	0.086	0	0	0	0	0	0	0	0
SO3	0	0	0.01	0.011	0.008	0	0	0.011	0.005	0.006	0	0	0.006	0.01	0.014	0	0.002	0	0.008	0.013	0	0.031	0.002	0.002	0	0	0	0.009	0	0.005	0.009	0.013	0.005	0.016	0	0	0	0	0	0	0	0
P2O5	42.001	40.834	41.1	41.577	41.792	42.045	41.861	41.109	41.681	41.23	41.568	41.828	42.349	41.971	42.663	41.368	42.168	41.304	41.803	41.748	42.592	41.936	42.037	42.02	41.94	41.677	42.169	41.779	41.587	42.397	42.128	42.539	42.319	40.165	42.56	42.72	42.59	42.5	42.49	42.61	42.23	42.59
FeO	0.015	0.037	0.014	0.019	0.02	0.274	0.012	0	0.04	0.078	0.054	0.024	0.038	0.047	0.013	0.059	0.004	0.018	0.034	0.103	0	0.01	0.022	0.016	0.026	0.025	0.001	0.03	0.109	0.026	0.001	0.032	0.004	0.037	0.13	0.03	0.12	0.13	0.06	0.03	0.07	0.03
MnO	2.578	1.436	2.079	2.139	1.298	3.554	1.31	0.614	2.323	2.665	1.791	1.942	1.399	2.715	0.776	3.392	1.198	1.88	2.182	3.344	0.251	1.27	1.495	1.267	0.98	1.462	1.442	1.568	3.743	1.46	1.118	1.709	0.839	2.479	4.77	1.04	4.87	6.39	4.35	3.8	4.9	3.61
CaO	53.896	52.604	51.833	54.738	54.499	52.054	54.23	55.726	53.802	53.693	53.836	54.46	54.983	53.284	54.8	52.282	54.737	54.42	54.003	52.437	55.966	55.587	54.069	54.26	54.7	53.434	55.058	54.484	51.967	54.936	54.709	54.093	55.3	50.16	49.92	53.31	49.89	48.64	50.3	51	49.91	51.09
----------------------------------------------------------
Total	100.258	96.36	96.462	101.305	100.138	100.267	99.822	99.624	100.051	100.048	99.37	100.461	101.473	100.625	100.78	99.22	100.42	100.304	100.498	99.965	101.103	102.129	99.943	99.941	99.79	98.807	101.039	100.01	99.928	101.485	100.291	100.758	100.542	96.328
Sr	11.3803	13.1251	7.04775	14.5427	20.7309	13.7879	19.2631	23.3799	11.1948	17.8428	16.8586	13.3196	13.9111	13.6756	17.299	13.4216	9.27028	14.1321	16.8143	14.0936	13.8772	11.9721	20.8136	14.319	21.0846	19.5454	16.3353	14.809	16.1349	17.485	19.1083	17.3493	23.0226	12.655	42.58	12.52	10.18	20.18	42.4	21.89	203	35.18
Y	60.0965	62.5269	120.32	86.6507	106.734	42.6392	38.6586	106.171	44.2968	41.4129	48.3768	173.274	99.8642	77.1799	450.165	67.6939	221.92	135.169	117.481	80.0495	62.1831	196.384	64.978	82.9886	76.6292	59.8056	94.2464	61.5479	81.7615	58.1351	67.3111	120.934	80.0872	79.7712	154.8	467	170	30.08	169	–	6.67	1.42
La	108.84	86.3572	253.196	103.301	171.679	67.5861	32.7009	93.0304	68.6869	42.7353	46.0269	164.315	128.887	109.273	202.858	99.4743	276.231	169.75	150.637	108.864	97.0539	213.074	92.1966	109.492	79.9842	67.4319	122.89	56.8034	112.014	63.966	82.508	126.958	80.7423	80.8575	83.17	423.3	286.3	53.01	219.5	0.78	16.14	1.96
Ce	170.788	144.353	504.917	170.043	329.216	102.098	52.0858	190.117	107.968	67.5621	76.3905	350.975	222.562	188.234	577.995	157.81	609.144	359.544	298.082	208.032	165.328	465.084	165.654	186.792	146.026	114.987	244.118	97.9034	222.216	115.866	152.521	275.747	137.351	164.593	148.1	999.7	443.1	63.44	388.7	0.33	19.58	1.81
Pr	14.119	12.5353	47.4295	14.6333	31.4167	8.3256	4.40158	19.4872	9.09944	5.70641	6.56607	36.6121	19.9118	16.0924	73.8339	13.4354	61.8662	36.4877	29.0235	19.5949	14.3746	49.581	14.9179	16.8335	13.4956	10.0821	21.3525	7.89477	20.9519	9.27257	13.3325	27.3812	11.4274	15.8501	13.59	119.5	34.52	4.71	43.81	–	1.97	–
Nd	29.3893	26.8205	101.24	28.0903	67.9419	16.5424	9.57968	48.1668	18.9103	10.9493	13.4226	94.6366	43.0078	36.0044	229.223	30.1472	148.917	96.9482	71.9546	46.4336	31.4992	122.644	32.7761	37.5271	29.9751	21.5858	48.4986	16.4951	47.7138	19.7148	30.1625	69.1888	26.6207	40.3588	32.82	357.2	62.84	10.72	86.16	–	3.02	0.32
Sm	11.1021	11.5649	39.8144	11.4028	28.443	7.15498	3.90215	22.415	7.37794	3.79838	5.26284	43.693	17.3494	14.9774	124.772	11.881	64.4524	37.0102	28.88	18.0819	11.9014	52.5417	12.753	15.8779	11.29	8.47761	19.7394	6.63775	19.9477	7.66373	11.7437	31.3613	10.8173	14.1685	15.43	150.9	20.61	4.4	28.14	–	0.81	0.17
Eu	1.69018	1.08229	2.06569	0.591536	1.63496	0.69899	0.188648	0.581178	0.858186	0.283912	0.276837	1.51721	0.926265	1.29542	1.63852	1.24569	1.94436	1.78194	1.21336	0.757746	1.23758	2.13454	0.814123	1.21718	0.654253	0.531444	1.00901	0.493966	1.24227	0.793028	0.480505	1.2538	0.355101	0.826795	2.28	2.59	0.39	0.23	0.42	–	–	–
Gd	7.32538	7.86083	25.497	8.04366	19.8313	4.47195	2.56016	16.5228	5.01808	3.07376	4.00617	31.4913	13.1673	9.49202	104.231	7.59926	45.2147	28.0634	20.7162	12.5227	8.26024	39.539	8.58066	11.3253	7.84061	5.81625	14.7163	4.82824	12.1872	5.48797	8.4795	21.6553	7.6699	10.7122	13	106.7	16.32	3.89	19.58	–	0.57	–
Tb	1.84044	2.03669	5.77676	2.10212	4.51777	1.20659	0.788802	3.93701	1.33127	0.840677	1.13698	7.52929	3.09058	2.36671	25.0292	2.01217	10.9914	5.87522	4.855	3.06911	1.94162	9.31218	2.22041	3.00276	2.18549	1.63016	3.82448	1.23746	2.886	1.41131	2.20226	5.08523	2.11093	2.34655	3.64	22.55	4.51	1.02	6.4	–	0.2	–
Dy	9.46215	9.98904	23.8312	12.1659	20.1644	6.14111	4.73236	18.7636	6.86971	5.25051	6.57189	33.8655	15.9347	12.2801	103.789	10.2025	45.5404	25.9565	21.9549	14.2632	10.1407	39.9355	10.692	14.1544	11.7983	8.35284	15.741	7.3975	13.3606	7.58034	12.1469	24.1455	11.7206	13.398	21.63	95.27	23.98	4.69	32.95	–	0.9	–
Ho	1.01177	1.10125	1.78708	1.60474	1.77484	0.717032	0.618825	2.00052	0.72542	0.726109	0.827267	3.06171	1.69467	1.22929	8.73057	1.05211	3.45082	2.42628	2.10788	1.26928	1.04588	3.49414	1.13215	1.42976	1.36525	0.999379	1.50001	0.931968	1.32465	1.00894	1.21997	2.18473	1.37055	1.51224	2.72	9.07	2.46	0.54	3.23	–	0.19	–
Er	2.22981	2.32433	2.61483	3.59289	3.34179	1.61999	1.75555	3.75988	1.51641	1.66823	1.98308	5.58227	3.1218	2.90479	12.358	2.61959	4.79945	4.6744	4.01098	2.44697	2.15473	6.08939	2.37481	2.80923	2.79605	2.35465	2.99809	2.44639	2.67525	2.4842	2.62249	3.58229	3.17448	2.82959	6.39	17.43	5.35	1.02	7.16	–	0.46	–
Tm	0.317436	0.327825	0.3201	0.630307	0.463065	0.269293	0.357519	0.491656	0.261668	0.327574	0.436706	0.687111	0.521906	0.4121	1.26438	0.318539	0.539646	0.60771	0.55101	0.336988	0.294361	0.707808	0.386564	0.417523	0.451001	0.419399	0.427338	0.421088	0.36443	0.498974	0.423431	0.459599	0.528348	0.416872	1.11	2.77	1.01	0.19	1.18	–	0.19	–
Yb	2.18076	2.33978	1.65176	4.55502	2.7347	1.72179	2.79246	3.08508	1.74005	2.52725	3.17307	3.7871	3.03562	2.62422	5.85048	2.13488	2.55563	3.46287	3.44055	1.96302	1.83433	4.15812	2.20868	2.65059	2.60301	2.89243	2.3964	3.45629	2.23774	3.97375	2.83791	2.96568	3.91779	2.77225	8.21	16.51	6.82	1.15	9.31	–	1.49	–
Lu	0.194103	0.198086	0.101644	0.430466	0.244656	0.173121	0.296893	0.247942	0.150287	0.268679	0.326796	0.322246	0.267216	0.214008	0.386877	0.190348	0.159425	0.280575	0.299654	0.130727	0.132341	0.325905	0.190913	0.232239	0.26253	0.244365	0.215392	0.384306	0.18201	0.437304	0.259432	0.24523	0.361863	0.138283	0.88	1.55	0.76	0.16	0.96	–	0.28	–
Pb	39.5861	37.5442	44.0498	42.3832	44.8752	42.0582	51.0176	12.6609	37.3479	36.4992	39.1537	34.925	40.4244	31.9599	29.7431	38.4276	50.3028	38.8525	35.3712	36.0152	27.6403	41.4959	26.7639	40.5759	21.9075	30.028	41.726	56.5389	51.5885	40.66	38.3268	31.9357	35.2709	226.762	92.45	21.62	35.88	60.06	227.4	144	95.32	274.3
Th	62.3276	47.255	65.3095	34.6401	15.5657	55.6209	64.549	12.7488	68.2199	47.0218	53.6322	35.048	56.0336	53.559	21.1756	53.0143	43.1185	36.1569	23.9758	42.0424	31.0552	36.6754	28.7444	57.8337	12.5595	26.1142	39.8015	30.4208	30.375	28.299	39.2418	27.9616	17.9599	50.4571	70.97	26.05	35.85	86.47	112.1	210.2	160.2	121.4
U	109.554	71.3496	164.556	68.1316	15.8394	63.8826	83.362	8.53176	79.7994	49.2163	66.2637	74.1981	76.7701	85.7113	33.0187	78.0523	144.522	78.7682	42.597	53.2717	52.4238	93.8707	44.2905	106.541	18.8971	57.5036	61.6132	42.3387	56.9119	46.5194	58.467	55.195	30.5326	74.545	133.8	57.03	39.71	66.36	130.5	145.5	171	38.54
Sum REE	360.49	308.891	1010.24	361.188	683.403	218.727	116.761	422.606	230.513	145.718	166.408	778.076	473.478	397.4	1471.96	340.123	1275.81	772.869	637.726	437.766	347.199	1008.62	346.898	403.762	310.727	245.805	499.426	207.332	459.304	240.159	320.94	592.214	298.168	350.78	353	2325	908.8	148.9	708.9	1.07	40.17	4.05
Y/Ho	59.3972	56.7779	67.3278	53.9968	60.1372	59.4662	62.4709	53.0716	61.0637	57.034	58.4779	56.5939	58.9285	62.7841	51.562	64.341	64.3094	55.7106	55.7344	63.0668	59.4555	56.2037	57.3937	58.0437	56.1282	59.8427	62.8305	66.0408	61.7229	57.6197	55.1742	55.3541	58.4345	52.7505	57.17	53.26	89.1	66.2	75.93	–	82.09	–
Th/U	0.568921	0.662301	0.396884	0.50843	0.98272	0.870674	0.774321	1.49428	0.854892	0.955411	0.809376	0.472357	0.729888	0.624877	0.641322	0.679215	0.298353	0.45903	0.562852	0.789207	0.592386	0.390701	0.648996	0.542831	0.664625	0.454131	0.64599	0.71851	0.533719	0.608326	0.671179	0.506596	0.58822	0.676867	0.72	0.65	1.05	1.95	1.8	1.77	1.01	5.13
Eu/Eu*	0.57298	0.347024	0.198209	0.188831	0.210459	0.377782	0.182469	0.0923257	0.43119	0.254023	0.18432	0.125045	0.187356	0.332151	0.0439258	0.400793	0.110114	0.169038	0.151656	0.153949	0.381596	0.143174	0.237929	0.277496	0.212593	0.231378	0.180989	0.266757	0.24358	0.37384	0.147209	0.147086	0.119185	0.205173	0.492157	0.0624017	0.0650113	0.169961	0.0547022	#VALUE!	#VALUE!	#VALUE!
(La/Yb)N	35.7998	26.4742	109.954	16.2673	45.0306	28.1564	8.39989	21.6301	28.3147	12.1294	10.4048	31.1222	30.4553	29.8684	24.8714	33.4225	77.5307	35.1621	31.4053	39.7796	37.9521	36.7565	29.9422	29.6306	22.0408	16.7226	36.7839	11.7887	35.9058	11.5465	20.8544	30.7069	14.783	20.9213	7.26648	18.3908	30.1119	33.0644	16.9116	#VALUE!	7.76994	#VALUE!
Sr/Eu	6.73316	12.1273	3.41181	24.5846	12.6798	19.7255	102.111	40.2285	13.0448	62.846	60.8972	8.77904	15.0185	10.5569	10.5577	10.7744	4.76778	7.93072	13.8577	18.5993	11.2131	5.60875	25.5656	11.7641	32.2271	36.7779	16.1895	29.9797	12.9882	22.0483	39.7671	13.8374	64.8339	15.3061	18.6754	4.83398	26.1026	87.7391	100.952	#VALUE!	#VALUE!	#VALUE!
(La/Lu)N	60.0953	46.723	266.969	25.7189	75.2049	41.8401	11.8044	40.2124	48.9821	17.0466	15.0945	54.648	51.6929	54.7227	56.1959	56.0076	185.695	64.8406	53.8761	89.2493	78.5965	70.0689	51.7565	50.5281	32.652	29.5741	61.1465	15.841	65.9575	15.6766	34.0845	55.4845	23.9135	62.6665	10.1291	29.2686	40.3732	35.5078	24.5047	#VALUE!	6.17776	#VALUE!

## Sheet: Sheet5
1	Apatite Formula Unit Calculations -with optional F correction
	type 1 in A1 for correction; type 0 in box A1 for no correction
	There is a considerable interference on the F peak (by P) - this can be corrected with an empirical correction (as here) or with pulse height analysis.
	The empirical value must be estimated on your instrument and input into row 108 (replace 2.072)																																		I	II	IV		V		VI	VIII
	APFU based on 25 oxygens; H2O calculated on the basis of filling the C site (2)																																		KH-30	KH-42	HH-44	KH-52	KH-54	KH-53	KH-50	KH-65
	KTH2-01	KTH2-02	KTH2-04	KTH2-06	KTH2-07	KTH2-08	KTH2-09	KTH2-10	KTH2-11	KTH2-12	KTH2-13	KTH2-14	KTH2-15	KTH2-16	KTH2-17	KTH2-18	KTH2-19	KTH2-21	KTH2-22	KTH2-23	KTH2-24	KTH2-25	KTH2-26	KTH2-27	KTH2-28	KTH2-29	KTH2-30	KTH2-31	KTH2-32	KTH2-33	KTH2-34	KTH2-35	KTH2-36	KTH2-37	KH-30	KH-42	HH-44	KH-52	KH-54	KH-53	KH-50	KH-65
P2O5	42.001	40.834	41.1	41.577	41.792	42.045	41.861	41.109	41.681	41.23	41.568	41.828	42.349	41.971	42.663	41.368	42.168	41.304	41.803	41.748	42.592	41.936	42.037	42.02	41.94	41.677	42.169	41.779	41.587	42.397	42.128	42.539	42.319	40.165	42.56	42.72	42.59	42.5	42.49	42.61	42.23	42.59
FeO	0.015	0.037	0.014	0.019	0.02	0.274	0.012	0	0.04	0.078	0.054	0.024	0.038	0.047	0.013	0.059	0.004	0.018	0.034	0.103	0	0.01	0.022	0.016	0.026	0.025	0.001	0.03	0.109	0.026	0.001	0.032	0.004	0.037	0.13	0.03	0.12	0.13	0.06	0.03	0.07	0.03
MnO	2.578	1.436	2.079	2.139	1.298	3.554	1.31	0.614	2.323	2.665	1.791	1.942	1.399	2.715	0.776	3.392	1.198	1.88	2.182	3.344	0.251	1.27	1.495	1.267	0.98	1.462	1.442	1.568	3.743	1.46	1.118	1.709	0.839	2.479	4.77	1.04	4.87	6.39	4.35	3.8	4.9	3.61
CaO	53.896	52.604	51.833	54.738	54.499	52.054	54.23	55.726	53.802	53.693	53.836	54.46	54.983	53.284	54.8	52.282	54.737	54.42	54.003	52.437	55.966	55.587	54.069	54.26	54.7	53.434	55.058	54.484	51.967	54.936	54.709	54.093	55.3	50.16	49.92	53.31	49.89	48.64	50.3	51	49.91	51.09
Na2O	0.013	0.025	0.011	0.018	0.004	0.004	0.031	0	0.05	0.016	0.03	0.017	0.034	0.023	0.012	0	0.019	0.008	0.012	0.018	0	0.131	0	0.041	0	0.034	0.011	0	0.026	0	0	0.034	0.017	0.057	0	0	0	0	0	0	0	0
K2O
SrO
BaO
Y2O3
ZnO
ThO2
UO2
F	2.992	2.46	2.4	4.837	4.304	3.987	4.105	3.728	3.703	4.069	3.612	3.783	4.572	4.448	4.282	3.655	3.949	4.597	4.221	3.974	3.961	5.441	3.988	4.026	3.699	3.757	4.073	3.69	4.306	4.595	4.016	4.02	3.533	5.778	3.53	3.69	3.62	3.53	3.59	3.52	3.5	3.62
Cl	0.002	0	0.005	0.004	0.001	0	0.002	0.007	0	0.006	0	0	0.009	0	0.004	0.004	0.007	0.005	0.004	0.002	0.001	0.005	0.004	0.005	0	0	0	0.005	0.001	0.001	0.001	0	0.009	0.086	0	0	0	0	0	0	0	0
F corr.	1.44402	1.18726	1.1583	2.33446	2.07722	1.92423	1.98118	1.79923	1.78716	1.9638	1.74324	1.82577	2.20656	2.14672	2.0666	1.764	1.90589	2.21863	2.03716	1.91795	1.91168	2.62597	1.92471	1.94305	1.78523	1.81322	1.96573	1.78089	2.07819	2.21766	1.93822	1.94015	1.70512	2.78861	1.70367	1.78089	1.7471	1.70367	1.73263	1.69884	1.68919	1.7471	0	0	0	0	0	0
H2O*	1.10011	1.16488	1.18032	0.673131	0.789542	0.862799	0.833473	0.911049	0.926688	0.832028	0.939582	0.916155	0.748101	0.760664	0.814512	0.919646	0.880848	0.714019	0.810891	0.858963	0.896302	0.547091	0.863754	0.854928	0.931353	0.900419	0.860759	0.931292	0.77733	0.745589	0.864603	0.873169	0.982924	0.346396	0.96388	0.936	0.944578	0.962366	0.948289	0.970459	0.962958	0.946296	#DIV/0!	#DIV/0!	#DIV/0!	#DIV/0!	#DIV/0!	#DIV/0!
Subtotal	101.049	97.2881	97.3806	101.503	100.481	100.718	100.261	100.166	100.61	100.484	99.9618	101.013	101.767	100.947	101.149	99.7886	100.92	100.568	100.886	100.429	101.618	102.112	100.415	100.407	100.363	99.3456	101.507	100.578	100.289	101.783	100.76	101.22	101.176	96.119	100.048	99.8169	100.162	100.326	99.8809	100.109	99.7621	100.013	#DIV/0!	#DIV/0!	#DIV/0!	#DIV/0!	#DIV/0!	#DIV/0!
O=F,Cl	0.608454	0.499895	0.48883	0.983826	0.874839	0.810196	0.834626	0.759143	0.752485	0.828212	0.733993	0.768741	0.931102	0.903876	0.871045	0.743632	0.804052	0.935281	0.858649	0.808005	0.805138	1.10679	0.811301	0.819248	0.751672	0.763458	0.827672	0.75097	0.875245	0.933973	0.816315	0.816902	0.719968	1.19353	0.717329	0.749843	0.735618	0.717329	0.729522	0.715297	0.711233	0.735618	0	0	0	0	0	0
Total	100.441	96.7882	96.8918	100.519	99.6059	99.9078	99.426	99.4071	99.8574	99.6556	99.2278	100.244	100.836	100.044	100.278	99.045	100.116	99.6324	100.027	99.6209	100.813	101.005	99.6042	99.5877	99.6109	98.5822	100.68	99.8272	99.4133	100.849	99.9435	100.403	100.456	94.9255	99.3302	99.067	99.4261	99.6087	99.1514	99.394	99.0509	99.2778	#DIV/0!	#DIV/0!	#DIV/0!	#DIV/0!	#DIV/0!	#DIV/0!
P	5.97215	5.99933	6.028	5.92615	5.97797	6.01257	5.9924	5.90946	5.9642	5.93105	5.97473	5.95912	5.98375	5.99069	6.0322	5.97671	5.99258	5.93312	5.96905	5.99137	5.99685	5.93592	6.00399	6.00114	5.9886	6.01077	5.97097	5.96846	5.98831	5.98814	5.99508	6.02241	5.98923	6.03168	6.0982	6.09111	6.09805	6.09481	6.09458	6.09061	6.07763	6.09215	#DIV/0!	#DIV/0!	#DIV/0!	#DIV/0!	#DIV/0!	#DIV/0!
Si	0	0	0	0	0	0	0	0	0	0	0	0	0	0	0	0	0	0	0	0	0	0	0	0	0	0	0	0	0	0	0	0	0	0	0	0	0	0	0	0	0	0	#DIV/0!	#DIV/0!	#DIV/0!	#DIV/0!	#DIV/0!	#DIV/0!
Al	0	0	0	0	0	0	0	0	0	0	0	0	0	0	0	0	0	0	0	0	0	0	0	0	0	0	0	0	0	0	0	0	0	0	0	0	0	0	0	0	0	0	#DIV/0!	#DIV/0!	#DIV/0!	#DIV/0!	#DIV/0!	#DIV/0!
Ti	0	0	0	0	0	0	0	0	0	0	0	0	0	0	0	0	0	0	0	0	0	0	0	0	0	0	0	0	0	0	0	0	0	0	0	0	0	0	0	0	0	0	#DIV/0!	#DIV/0!	#DIV/0!	#DIV/0!	#DIV/0!	#DIV/0!
Fe	0.00210682	0.00536968	0.00202827	0.00267509	0.0028259	0.0387046	0.00169683	0	0.0056538	0.0110836	0.00766689	0.00337748	0.00530372	0.00662661	0.00181566	0.00842008	0.000561509	0.00255405	0.0047956	0.0146014	0	0.00139819	0.00310382	0.00225717	0.00366722	0.00356156	0.000139868	0.00423343	0.0155039	0.00362741	0.000140569	0.00447507	0.000559194	0.00548856	0.0183997	0.00422525	0.0169719	0.0184154	0.00850109	0.00423582	0.00995125	0.00423887	#DIV/0!	#DIV/0!	#DIV/0!	#DIV/0!	#DIV/0!	#DIV/0!
Mn	0.366738	0.211075	0.305062	0.305023	0.185754	0.50847	0.187614	0.0883042	0.332556	0.383546	0.257547	0.2768	0.197765	0.387703	0.109771	0.490293	0.170329	0.270179	0.311713	0.48013	0.0353566	0.179849	0.213625	0.181032	0.139999	0.210952	0.204277	0.224105	0.539223	0.206306	0.159172	0.242062	0.118795	0.372451	0.683786	0.148354	0.697613	0.916799	0.624235	0.543419	0.705523	0.516621	#DIV/0!	#DIV/0!	#DIV/0!	#DIV/0!	#DIV/0!	#DIV/0!
Mg	0	0	0	0	0	0	0	0	0	0	0	0	0	0	0	0	0	0	0	0	0	0	0	0	0	0	0	0	0	0	0	0	0	0	0	0	0	0	0	0	0	0	#DIV/0!	#DIV/0!	#DIV/0!	#DIV/0!	#DIV/0!	#DIV/0!
Zn	0	0	0	0	0	0	0	0	0	0	0	0	0	0	0	0	0	0	0	0	0	0	0	0	0	0	0	0	0	0	0	0	0	0	0	0	0	0	0	0	0	0	#DIV/0!	#DIV/0!	#DIV/0!	#DIV/0!	#DIV/0!	#DIV/0!
Ca	9.69868	9.78103	9.62106	9.874	9.86584	9.42074	9.82462	10.138	9.74311	9.7751	9.79303	9.81924	9.83205	9.62519	9.80596	9.5595	9.84457	9.89315	9.7589	9.52388	9.97251	9.95771	9.77331	9.80715	9.88483	9.75296	9.86637	9.85051	9.47021	9.81972	9.85299	9.69191	9.90481	9.53307	9.05232	9.61965	9.04029	8.82775	9.13082	9.22581	9.09046	9.24877	#DIV/0!	#DIV/0!	#DIV/0!	#DIV/0!	#DIV/0!	#DIV/0!
Na	0.00423336	0.00841186	0.00369484	0.00587575	0.00131036	0.00131002	0.0101631	0	0.0163853	0.00527121	0.00987534	0.00554671	0.0110022	0.00751842	0.00388577	0	0.00618381	0.0026318	0.0039242	0.00591609	0	0.0424663	0	0.0134101	0	0.0112301	0.00356711	0	0.00857416	0	0	0.0110239	0.00551006	0.0196036	0	0	0	0	0	0	0	0	#DIV/0!	#DIV/0!	#DIV/0!	#DIV/0!	#DIV/0!	#DIV/0!
K	0	0	0	0	0	0	0	0	0	0	0	0	0	0	0	0	0	0	0	0	0	0	0	0	0	0	0	0	0	0	0	0	0	0	0	0	0	0	0	0	0	0	#DIV/0!	#DIV/0!	#DIV/0!	#DIV/0!	#DIV/0!	#DIV/0!
Sr	0	0	0	0	0	0	0	0	0	0	0	0	0	0	0	0	0	0	0	0	0	0	0	0	0	0	0	0	0	0	0	0	0	0	0	0	0	0	0	0	0	0	#DIV/0!	#DIV/0!	#DIV/0!	#DIV/0!	#DIV/0!	#DIV/0!
Ba	0	0	0	0	0	0	0	0	0	0	0	0	0	0	0	0	0	0	0	0	0	0	0	0	0	0	0	0	0	0	0	0	0	0	0	0	0	0	0	0	0	0	#DIV/0!	#DIV/0!	#DIV/0!	#DIV/0!	#DIV/0!	#DIV/0!
Y	0	0	0	0	0	0	0	0	0	0	0	0	0	0	0	0	0	0	0	0	0	0	0	0	0	0	0	0	0	0	0	0	0	0	0	0	0	0	0	0	0	0	#DIV/0!	#DIV/0!	#DIV/0!	#DIV/0!	#DIV/0!	#DIV/0!
Th	0	0	0	0	0	0	0	0	0	0	0	0	0	0	0	0	0	0	0	0	0	0	0	0	0	0	0	0	0	0	0	0	0	0	0	0	0	0	0	0	0	0	#DIV/0!	#DIV/0!	#DIV/0!	#DIV/0!	#DIV/0!	#DIV/0!
U	0	0	0	0	0	0	0	0	0	0	0	0	0	0	0	0	0	0	0	0	0	0	0	0	0	0	0	0	0	0	0	0	0	0	0	0	0	0	0	0	0	0	#DIV/0!	#DIV/0!	#DIV/0!	#DIV/0!	#DIV/0!	#DIV/0!
Cl	0.000569348	0	0.00146818	0.00114145	0.000286377	0	0.000573189	0.00201459	0	0.00172801	0	0	0.00254595	0	0.0011323	0.001157	0.00199162	0.00143793	0.0011435	0.000574642	0.000281885	0.00141693	0.00114379	0.00142963	0	0	0	0.00143005	0.000288286	0.00028277	0.000284906	0	0.00255009	0.0258562	0	0	0	0	0	0	0	0	#DIV/0!	#DIV/0!	#DIV/0!	#DIV/0!	#DIV/0!	#DIV/0!
F	0.766977	0.651577	0.634589	1.24293	1.1099	1.02788	1.05939	0.966133	0.955251	1.05525	0.935958	0.971631	1.16463	1.14457	1.09149	0.951996	1.01174	1.19046	1.08658	1.02818	1.00543	1.38845	1.02686	1.03658	0.952206	0.976842	1.03972	0.950343	1.11782	1.17002	1.03031	1.02603	0.901424	1.56429	0.911852	0.948509	0.934419	0.912633	0.928327	0.907072	0.908094	0.933515	#DIV/0!	#DIV/0!	#DIV/0!	#DIV/0!	#DIV/0!	#DIV/0!
OH*	1.23245	1.34842	1.36394	0.755933	0.889817	0.972121	0.940042	1.03185	1.04475	0.94302	1.06404	1.02837	0.832828	0.855431	0.907375	1.04685	0.986271	0.808101	0.912273	0.971247	0.994293	0.610135	0.971992	0.961994	1.04779	1.02316	0.960281	1.04823	0.881895	0.8297	0.969406	0.973972	1.09603	0.409853	1.08815	1.05149	1.06558	1.08737	1.07167	1.09293	1.09191	1.06649	#DIV/0!	#DIV/0!	#DIV/0!	#DIV/0!	#DIV/0!	#DIV/0!
TOTAL	18.0439	18.0052	17.9598	18.1137	18.0337	17.9818	18.0165	18.1358	18.0619	18.1061	18.0428	18.0641	18.0299	18.0177	17.9536	18.0349	18.0142	18.1016	18.0484	18.0159	18.0047	18.1173	17.994	18.005	18.0171	17.9895	18.0453	18.0473	18.0218	18.0178	18.0074	17.9719	18.0189	17.9623	17.8527	17.8633	17.8529	17.8578	17.8581	17.8641	17.8836	17.8618	#DIV/0!	#DIV/0!	#DIV/0!	#DIV/0!	#DIV/0!	#DIV/0!
A sum	5.97215	5.99933	6.028	5.92615	5.97797	6.01257	5.9924	5.90946	5.9642	5.93105	5.97473	5.95912	5.98375	5.99069	6.0322	5.97671	5.99258	5.93312	5.96905	5.99137	5.99685	5.93592	6.00399	6.00114	5.9886	6.01077	5.97097	5.96846	5.98831	5.98814	5.99508	6.02241	5.98923	6.03168	6.0982	6.09111	6.09805	6.09481	6.09458	6.09061	6.07763	6.09215	#DIV/0!	#DIV/0!	#DIV/0!	#DIV/0!	#DIV/0!	#DIV/0!
B sum	10.0718	10.0059	9.93185	10.1876	10.0557	9.96923	10.0241	10.2263	10.0977	10.175	10.0681	10.105	10.0461	10.027	9.92144	10.0582	10.0216	10.1685	10.0793	10.0245	10.0079	10.1814	9.99003	10.0038	10.0285	9.9787	10.0744	10.0788	10.0335	10.0297	10.0123	9.94948	10.0297	9.93061	9.7545	9.77222	9.75487	9.76297	9.76356	9.77347	9.80593	9.76963	#DIV/0!	#DIV/0!	#DIV/0!	#DIV/0!	#DIV/0!	#DIV/0!
C sum	2	2	2	2	2	2	2	2	2	2	2	2	2	2	2	2	2	2	2	2	2	2	2	2	2	2	2	2	2	2	2	2	2	2	2	2	2	2	2	2	2	2	#DIV/0!	#DIV/0!	#DIV/0!	#DIV/0!	#DIV/0!	#DIV/0!
Supplementary calculations hidden from view
************
SiO2	0	0	0	0	0	0	0	0	0	0	0	0	0	0	0	0	0	0	0	0	0	0	0	0	0	0	0	0	0	0	0	0	0	0	0	0	0	0	0	0	0	0	0	0	0	0	0	0
TiO2	0	0	0	0	0	0	0	0	0	0	0	0	0	0	0	0	0	0	0	0	0	0	0	0	0	0	0	0	0	0	0	0	0	0	0	0	0	0	0	0	0	0	0	0	0	0	0	0
Al2O3	0	0	0	0	0	0	0	0	0	0	0	0	0	0	0	0	0	0	0	0	0	0	0	0	0	0	0	0	0	0	0	0	0	0	0	0	0	0	0	0	0	0	0	0	0	0	0	0
FeO	0.000208768	0.000514962	0.00019485	0.00026444	0.000278358	0.0038135	0.000167015	0	0.000556715	0.00108559	0.000751566	0.000334029	0.00052888	0.000654141	0.000180932	0.000821155	5.56715e-05	0.000250522	0.000473208	0.00143354	0	0.000139179	0.000306193	0.000222686	0.000361865	0.000347947	1.39179e-05	0.000417537	0.00151705	0.000361865	1.39179e-05	0.000445372	5.56715e-05	0.000514962	0.00180932	0.000417537	0.00167015	0.00180932	0.000835073	0.000417537	0.000974252	0.000417537	0	0	0	0	0	0
MnO	0.0363406	0.0202425	0.0293065	0.0301522	0.0182972	0.0500987	0.0184663	0.0086552	0.032746	0.037567	0.0252467	0.0273752	0.0197209	0.0382718	0.0109388	0.0478151	0.0168875	0.0265013	0.0307584	0.0471384	0.0035382	0.0179025	0.0210741	0.0178602	0.0138145	0.020609	0.020327	0.0221032	0.0527629	0.0205808	0.0157598	0.0240908	0.0118269	0.034945	0.0672399	0.0146603	0.0686496	0.0900761	0.0613194	0.0535664	0.0690725	0.0508881	0	0	0	0	0	0
MgO	0	0	0	0	0	0	0	0	0	0	0	0	0	0	0	0	0	0	0	0	0	0	0	0	0	0	0	0	0	0	0	0	0	0	0	0	0	0	0	0	0	0	0	0	0	0	0	0
CaO	0.961056	0.938017	0.924269	0.97607	0.971808	0.92821	0.967011	0.993688	0.959379	0.957436	0.959986	0.971113	0.980439	0.950143	0.977175	0.932275	0.976052	0.970399	0.962964	0.935039	0.997967	0.991209	0.964141	0.967546	0.975392	0.952817	0.981776	0.971541	0.926658	0.979601	0.975553	0.964568	0.986091	0.894437	0.890157	0.950606	0.889622	0.867332	0.896933	0.909415	0.889979	0.91102	0	0	0	0	0	0
Na2O	0.000209745	0.000403356	0.000177477	0.000290416	6.45369e-05	6.45369e-05	0.000500161	0	0.000806712	0.000258148	0.000484027	0.000274282	0.000548564	0.000371087	0.000193611	0	0.000306551	0.000129074	0.000193611	0.000290416	0	0.00211359	0	0.000661504	0	0.000548564	0.000177477	0	0.00041949	0	0	0.000548564	0.000274282	0.000919652	0	0	0	0	0	0	0	0	0	0	0	0	0	0
K2O	0	0	0	0	0	0	0	0	0	0	0	0	0	0	0	0	0	0	0	0	0	0	0	0	0	0	0	0	0	0	0	0	0	0	0	0	0	0	0	0	0	0	0	0	0	0	0	0
SrO	0	0	0	0	0	0	0	0	0	0	0	0	0	0	0	0	0	0	0	0	0	0	0	0	0	0	0	0	0	0	0	0	0	0	0	0	0	0	0	0	0	0	0	0	0	0	0	0
BaO	0	0	0	0	0	0	0	0	0	0	0	0	0	0	0	0	0	0	0	0	0	0	0	0	0	0	0	0	0	0	0	0	0	0	0	0	0	0	0	0	0	0	0	0	0	0	0	0
Rb2O/P2O5	1.47947	1.43836	1.44773	1.46454	1.47211	1.48102	1.47454	1.44805	1.4682	1.45231	1.46422	1.47338	1.49173	1.47841	1.50279	1.45717	1.48535	1.45492	1.4725	1.47056	1.50029	1.47718	1.48074	1.48014	1.47732	1.46806	1.48539	1.47165	1.46489	1.49342	1.48394	1.49842	1.49067	1.4148	1.49916	1.5048	1.50022	1.49705	1.4967	1.50092	1.48754	1.50022	0	0	0	0	0	0
Cs2O/Y2O3	0	0	0	0	0	0	0	0	0	0	0	0	0	0	0	0	0	0	0	0	0	0	0	0	0	0	0	0	0	0	0	0	0	0	0	0	0	0	0	0	0	0	0	0	0	0	0	0
ZnO	0	0	0	0	0	0	0	0	0	0	0	0	0	0	0	0	0	0	0	0	0	0	0	0	0	0	0	0	0	0	0	0	0	0	0	0	0	0	0	0	0	0	0	0	0	0	0	0
Sn/ThO2	0	0	0	0	0	0	0	0	0	0	0	0	0	0	0	0	0	0	0	0	0	0	0	0	0	0	0	0	0	0	0	0	0	0	0	0	0	0	0	0	0	0	0	0	0	0	0	0
Ga/UO2	0	0	0	0	0	0	0	0	0	0	0	0	0	0	0	0	0	0	0	0	0	0	0	0	0	0	0	0	0	0	0	0	0	0	0	0	0	0	0	0	0	0	0	0	0	0	0	0
F	0.0760008	0.0624873	0.0609632	0.122866	0.109327	0.101275	0.104273	0.0946962	0.0940612	0.103358	0.0917496	0.0960933	0.116135	0.112985	0.108769	0.0928419	0.10031	0.11677	0.107219	0.100945	0.100615	0.138209	0.101301	0.102266	0.0939596	0.0954328	0.10346	0.0937309	0.109378	0.116719	0.102012	0.102113	0.0897429	0.146769	0.0896667	0.0937309	0.0919529	0.0896667	0.0911908	0.0894127	0.0889047	0.0919529	0	0	0	0	0	0
Cl	5.64175e-05	0	0.000141044	0.000112835	2.82087e-05	0	5.64175e-05	0.000197461	0	0.000169252	0	0	0.000253879	0	0.000112835	0.000112835	0.000197461	0.000141044	0.000112835	5.64175e-05	2.82087e-05	0.000141044	0.000112835	0.000141044	0	0	0	0.000141044	2.82087e-05	2.82087e-05	2.82087e-05	0	0.000253879	0.00242595	0	0	0	0	0	0	0	0	0	0	0	0	0	0
sum	2.55334	2.46003	2.46279	2.59429	2.57191	2.56448	2.56501	2.54529	2.55575	2.55219	2.54244	2.56857	2.60936	2.58084	2.60016	2.53104	2.57916	2.56911	2.57422	2.55546	2.60244	2.6269	2.56767	2.56884	2.56085	2.53781	2.59114	2.55958	2.55565	2.61071	2.57731	2.59019	2.57892	2.49481	2.54803	2.56421	2.55211	2.54593	2.54697	2.55373	2.53647	2.5545	0	0	0	0	0	0
F,Cl corr	2.47729	2.39754	2.40168	2.47131	2.46256	2.46321	2.46068	2.45039	2.46169	2.44866	2.45069	2.47247	2.49297	2.46785	2.49128	2.43809	2.47866	2.4522	2.46689	2.45446	2.50179	2.48855	2.46626	2.46643	2.46689	2.44238	2.48768	2.46571	2.44625	2.49396	2.47527	2.48808	2.48892	2.34561	2.45837	2.47048	2.46016	2.45627	2.45578	2.46432	2.44756	2.46254	0	0	0	0	0	0
no. of O	10.0917	10.4273	10.4094	10.1161	10.152	10.1494	10.1598	10.2024	10.1556	10.2097	10.2012	10.1113	10.0282	10.1303	10.035	10.2539	10.0861	10.1949	10.1342	10.1855	9.99283	10.046	10.1368	10.1361	10.1342	10.2359	10.0495	10.1391	10.2197	10.0242	10.0999	10.0479	10.0445	10.6582	10.1693	10.1195	10.1619	10.1781	10.1801	10.1448	10.2142	10.1521	#DIV/0!	#DIV/0!	#DIV/0!	#DIV/0!	#DIV/0!	#DIV/0!
SiO2	0	0	0	0	0	0	0	0	0	0	0	0	0	0	0	0	0	0	0	0	0	0	0	0	0	0	0	0	0	0	0	0	0	0	0	0	0	0	0	0	0	0	#DIV/0!	#DIV/0!	#DIV/0!	#DIV/0!	#DIV/0!	#DIV/0!
TiO2	0	0	0	0	0	0	0	0	0	0	0	0	0	0	0	0	0	0	0	0	0	0	0	0	0	0	0	0	0	0	0	0	0	0	0	0	0	0	0	0	0	0	#DIV/0!	#DIV/0!	#DIV/0!	#DIV/0!	#DIV/0!	#DIV/0!
Al2O3	0	0	0	0	0	0	0	0	0	0	0	0	0	0	0	0	0	0	0	0	0	0	0	0	0	0	0	0	0	0	0	0	0	0	0	0	0	0	0	0	0	0	#DIV/0!	#DIV/0!	#DIV/0!	#DIV/0!	#DIV/0!	#DIV/0!
FeO	0.00210682	0.00536968	0.00202827	0.00267509	0.0028259	0.0387046	0.00169683	0	0.0056538	0.0110836	0.00766689	0.00337748	0.00530372	0.00662661	0.00181566	0.00842008	0.000561509	0.00255405	0.0047956	0.0146014	0	0.00139819	0.00310382	0.00225717	0.00366722	0.00356156	0.000139868	0.00423343	0.0155039	0.00362741	0.000140569	0.00447507	0.000559194	0.00548856	0.0183997	0.00422525	0.0169719	0.0184154	0.00850109	0.00423582	0.00995125	0.00423887	#DIV/0!	#DIV/0!	#DIV/0!	#DIV/0!	#DIV/0!	#DIV/0!
MnO	0.366738	0.211075	0.305062	0.305023	0.185754	0.50847	0.187614	0.0883042	0.332556	0.383546	0.257547	0.2768	0.197765	0.387703	0.109771	0.490293	0.170329	0.270179	0.311713	0.48013	0.0353566	0.179849	0.213625	0.181032	0.139999	0.210952	0.204277	0.224105	0.539223	0.206306	0.159172	0.242062	0.118795	0.372451	0.683786	0.148354	0.697613	0.916799	0.624235	0.543419	0.705523	0.516621	#DIV/0!	#DIV/0!	#DIV/0!	#DIV/0!	#DIV/0!	#DIV/0!
MgO	0	0	0	0	0	0	0	0	0	0	0	0	0	0	0	0	0	0	0	0	0	0	0	0	0	0	0	0	0	0	0	0	0	0	0	0	0	0	0	0	0	0	#DIV/0!	#DIV/0!	#DIV/0!	#DIV/0!	#DIV/0!	#DIV/0!
CaO	9.69868	9.78103	9.62106	9.874	9.86584	9.42074	9.82462	10.138	9.74311	9.7751	9.79303	9.81924	9.83205	9.62519	9.80596	9.5595	9.84457	9.89315	9.7589	9.52388	9.97251	9.95771	9.77331	9.80715	9.88483	9.75296	9.86637	9.85051	9.47021	9.81972	9.85299	9.69191	9.90481	9.53307	9.05232	9.61965	9.04029	8.82775	9.13082	9.22581	9.09046	9.24877	#DIV/0!	#DIV/0!	#DIV/0!	#DIV/0!	#DIV/0!	#DIV/0!
Na2O	0.00211668	0.00420593	0.00184742	0.00293787	0.000655182	0.000655009	0.00508153	0	0.00819267	0.0026356	0.00493767	0.00277336	0.00550112	0.00375921	0.00194289	0	0.0030919	0.0013159	0.0019621	0.00295805	0	0.0212331	0	0.00670507	0	0.00561505	0.00178355	0	0.00428708	0	0	0.00551193	0.00275503	0.00980182	0	0	0	0	0	0	0	0	#DIV/0!	#DIV/0!	#DIV/0!	#DIV/0!	#DIV/0!	#DIV/0!
K2O	0	0	0	0	0	0	0	0	0	0	0	0	0	0	0	0	0	0	0	0	0	0	0	0	0	0	0	0	0	0	0	0	0	0	0	0	0	0	0	0	0	0	#DIV/0!	#DIV/0!	#DIV/0!	#DIV/0!	#DIV/0!	#DIV/0!
SrO	0	0	0	0	0	0	0	0	0	0	0	0	0	0	0	0	0	0	0	0	0	0	0	0	0	0	0	0	0	0	0	0	0	0	0	0	0	0	0	0	0	0	#DIV/0!	#DIV/0!	#DIV/0!	#DIV/0!	#DIV/0!	#DIV/0!
BaO	0	0	0	0	0	0	0	0	0	0	0	0	0	0	0	0	0	0	0	0	0	0	0	0	0	0	0	0	0	0	0	0	0	0	0	0	0	0	0	0	0	0	#DIV/0!	#DIV/0!	#DIV/0!	#DIV/0!	#DIV/0!	#DIV/0!
Rb2O/P	14.9304	14.9983	15.07	14.8154	14.9449	15.0314	14.981	14.7737	14.9105	14.8276	14.9368	14.8978	14.9594	14.9767	15.0805	14.9418	14.9814	14.8328	14.9226	14.9784	14.9921	14.8398	15.01	15.0029	14.9715	15.0269	14.9274	14.9212	14.9708	14.9703	14.9877	15.056	14.9731	15.0792	15.2455	15.2278	15.2451	15.237	15.2364	15.2265	15.1941	15.2304	#DIV/0!	#DIV/0!	#DIV/0!	#DIV/0!	#DIV/0!	#DIV/0!
Cs2O/Y	0	0	0	0	0	0	0	0	0	0	0	0	0	0	0	0	0	0	0	0	0	0	0	0	0	0	0	0	0	0	0	0	0	0	0	0	0	0	0	0	0	0	#DIV/0!	#DIV/0!	#DIV/0!	#DIV/0!	#DIV/0!	#DIV/0!
ZnO	0	0	0	0	0	0	0	0	0	0	0	0	0	0	0	0	0	0	0	0	0	0	0	0	0	0	0	0	0	0	0	0	0	0	0	0	0	0	0	0	0	0	#DIV/0!	#DIV/0!	#DIV/0!	#DIV/0!	#DIV/0!	#DIV/0!
Sn/Th	0	0	0	0	0	0	0	0	0	0	0	0	0	0	0	0	0	0	0	0	0	0	0	0	0	0	0	0	0	0	0	0	0	0	0	0	0	0	0	0	0	0	#DIV/0!	#DIV/0!	#DIV/0!	#DIV/0!	#DIV/0!	#DIV/0!
Ga/U	0	0	0	0	0	0	0	0	0	0	0	0	0	0	0	0	0	0	0	0	0	0	0	0	0	0	0	0	0	0	0	0	0	0	0	0	0	0	0	0	0	0	#DIV/0!	#DIV/0!	#DIV/0!	#DIV/0!	#DIV/0!	#DIV/0!
F	0.766977	0.651577	0.634589	1.24293	1.1099	1.02788	1.05939	0.966133	0.955251	1.05525	0.935958	0.971631	1.16463	1.14457	1.09149	0.951996	1.01174	1.19046	1.08658	1.02818	1.00543	1.38845	1.02686	1.03658	0.952206	0.976842	1.03972	0.950343	1.11782	1.17002	1.03031	1.02603	0.901424	1.56429	0.911852	0.948509	0.934419	0.912633	0.928327	0.907072	0.908094	0.933515	#DIV/0!	#DIV/0!	#DIV/0!	#DIV/0!	#DIV/0!	#DIV/0!
Cl	0.000569348	0	0.00146818	0.00114145	0.000286377	0	0.000573189	0.00201459	0	0.00172801	0	0	0.00254595	0	0.0011323	0.001157	0.00199162	0.00143793	0.0011435	0.000574642	0.000281885	0.00141693	0.00114379	0.00142963	0	0	0	0.00143005	0.000288286	0.00028277	0.000284906	0	0.00255009	0.0258562	0	0	0	0	0	0	0	0	#DIV/0!	#DIV/0!	#DIV/0!	#DIV/0!	#DIV/0!	#DIV/0!
check if F	1.44402	1.18726	1.1583	2.33446	2.07722	1.92423	1.98118	1.79923	1.78716	1.9638	1.74324	1.82577	2.20656	2.14672	2.0666	1.764	1.90589	2.21863	2.03716	1.91795	1.91168	2.62597	1.92471	1.94305	1.78523	1.81322	1.96573	1.78089	2.07819	2.21766	1.93822	1.94015	1.70512	2.78861	1.70367	1.78089	1.7471	1.70367	1.73263	1.69884	1.68919	1.7471	0	0	0	0	0	0
corr. needed	1.44402	1.18726	1.1583	2.33446	2.07722	1.92423	1.98118	1.79923	1.78716	1.9638	1.74324	1.82577	2.20656	2.14672	2.0666	1.764	1.90589	2.21863	2.03716	1.91795	1.91168	2.62597	1.92471	1.94305	1.78523	1.81322	1.96573	1.78089	2.07819	2.21766	1.93822	1.94015	1.70512	2.78861	1.70367	1.78089	1.7471	1.70367	1.73263	1.69884	1.68919	1.7471	0	0	0	0	0	0
						at. wt.	AW*no cations
	(ox.%/mol.wt)*no.of oxygens				P	30.973	61.946	80
	(e.g. mol.wt=at.wt.Si+2*at.wt of oxygen)				Y	88.9059	177.812	48
	(e.g. mol.wt=2*at.wt.P+5*at.wt of oxygen)				Th	232.038	232.038	32
	rows 71-88 calculations				U	238.029	238.029	32
					Al	26.981	53.962	48
					K	39.0983	78.1966	16
					Ca	40.08	40.08	16
************

## Sheet: Sheet9
											0.251		2.992	2.46	2.4	4.837	4.304	3.987	4.105	3.728	3.703	4.069	3.612	3.783	4.572	4.448	4.282	3.655	3.949	4.597	4.221	3.974	3.961	5.441	3.988	4.026	3.699	3.757	4.073	3.69	4.306	4.595	4.016	4.02	3.533	5.778
											0.614
											0.776		2.4
											0.839		2.46		50.16	40.165
											0.98		2.992		51.833	40.834
											1.118		3.533		51.967	41.1
											1.198		3.612		52.054	41.109
											1.267		3.655		52.282	41.23
											1.27		3.69		52.437	41.304
											1.298		3.699		52.604	41.368
											1.31		3.703		53.284	41.568
											1.399		3.728		53.434	41.577
											1.436		3.757		53.693	41.587
											1.442		3.783		53.802	41.677
											1.46		3.949		53.836	41.681
											1.462		3.961		53.896	41.748
											1.495		3.974		54.003	41.779
											1.568		3.987		54.069	41.792
											1.709		3.988		54.093	41.803
											1.791		4.016		54.23	41.828
											1.88		4.02		54.26	41.861
											1.942		4.026		54.42	41.936
											2.079		4.069		54.46	41.94
											2.139		4.073		54.484	41.971
											2.182		4.105		54.499	42.001
											2.323		4.221		54.7	42.02
											2.479		4.282		54.709	42.037
											2.578		4.304		54.737	42.045
											2.665		4.306		54.738	42.128
											2.715		4.448		54.8	42.168
											3.344		4.572		54.936	42.169
											3.392		4.595		54.983	42.319
											3.554		4.597		55.058	42.349
											3.743		4.837		55.3	42.397
													5.441		55.587	42.539
													5.778		55.726	42.56
															55.966	42.592
																42.663
