# Supplementary material
Source: publisher figshare collection journal article supplement (https://gsapubs.figshare.com/articles/dataset/_/20431734)
Supplement: Supplementary file 1 [file 2]

Han, J., Zhao, Z., Hollings, P., and Chen, H., 2022, A 50 m.y. melting model for the rare metal-rich Koktokay pegmatite in the Chinese Altai: Implications from a newly-identified Jurassic granite: *GSA Bulletin*, <https://doi.org/10.1130/B36513.1>.

## Supplemental Material

**Table S1.** Major (wt%) and trace (ppm) element compositions of apatite from the granite apophysis and the Koktokay No. 3 pegmatite.

**Table S2.** Major element composition of columbite in the granite apophysis.

**Table S3.** Major and trace element composition of micas in the granite apophysis.

**Table S4.** Major (wt%) and trace (ppm) elements for the granite apophysis.

**Table S5.** LA-ICP-MS U-Pb analytical results of columbites and apatites.

**Table S6.** Whole-rock Sr-Nd-Hf isotopes of the granite apophysis in the Koktokay No. 3 pegmatite.

**Table S7.** Multicollector LA-ICP-MS boron isotopes of tourmalines from the granite apophysis.

**Table S8.** Compiled age data of magmatic-hydrothermal activities in the Koktokay No. 3 pegmatite.

### REFERENCES CITED (Table S8)

Cai, K., Sun, M., Yuan, C., Zhao, G., Xiao, W., and Long, X., 2012b, Keketuohai mafic–ultramafic complex in the Chinese Altai, NW China: Petrogenesis and geodynamic significance: *Chemical Geology*, v. 294–295, p. 26–41, <https://doi.org/10.1016/j.chemgeo.2011.11.031>.

Che, X.-D., Wu, F.-Y., Wang, R.-C., Gerdes, A., Ji, W.-Q., Zhao, Z.-H., Yang, J.-H., and Zhu, Z.-Y., 2015, In situ U–Pb isotopic dating of columbite–tantalite by LA–ICP–MS: *Ore Geology Reviews*, v. 65, p. 979–989, <https://doi.org/10.1016/j.oregeorev.2014.07.008>.

Chen, J.F., Zhang, H., Zhang, J.X., and Ma, H.Y., 2018, Geochronology and Hf isotope of zircon for Koktokay No. 3 granitic pegmatite in Xinjiang and its geological implications: *The Chinese Journal of Nonferrous Metals (Zhongguo Youse Jinshu Xuebao)*, v. 28, p. 1832–1844 [in Chinese with English abstract].

Liu, F., Zhang, Z.-X., Li, Q., Zhang, C., and Li, C., 2014, New precise timing constraint for the Keketuohai No. 3 pegmatite in Xinjiang, China, and identification of its parental pluton: *Ore Geology Reviews*, v. 56, p. 209–219, <https://doi.org/10.1016/j.oregeorev.2013.08.020>.

Ren, B.Q., Zhang, H., Tang, Y., and Lu, Z.H., 2011, LA-ICPMS U-Pb zircon geochronology of the Altai pegmatites and its geological significance: *Acta Mineralogica Sinica*, v. 31, p. 587–596 [in Chinese with English abstract].

Wang, T., Hong, D.W., Jahn, B.M., Tong, Y., Wang, Y.B., Han, B.F., and Wang, X.X., 2006, Timing, petrogenesis, and setting of Paleozoic synorogenic intrusions from the Altai Mountains, Northwest China: Implications for the tectonic evolution of an accretionary orogeny: *The Journal of Geology*, v. 114, p. 735–751, <https://doi.org/10.1086/507617>.

Wang, T., Tong, Y., Jahn, B.-M., Zou, T.-R., Wang, Y.B., Hong, D.W., and Han, B.-F., 2007, SHRIMP U–Pb Zircon geochronology of the Altai No. 3 Pegmatite, NW China, and its implications for the origin and tectonic setting of the pegmatite: *Ore Geology Reviews*, v. 32, p. 325–336, <https://doi.org/10.1016/j.oregeorev.2006.10.001>.

Zhou, Q., Qin, K., and Tang, D., 2015, Formation Age and Evolution Time Span of the Koktokay No. 3 Pegmatite, Altai, NW China: Evidence from U–Pb Zircon and  $^{40}\text{Ar}$ – $^{39}\text{Ar}$  Muscovite Ages: *Resource Geology*, v. 65, no. 3, p. 210–231, <https://doi.org/10.1111/rge.12067>.

Zhu, J.C., Wu, C.N., Liu, C.S., Li, F.C., Huang, X.L., and Zhou, D.S., 2000, Magmatic-hydrothermal evolution and genesis of Koktokay No. 3 rare metal pegmatite dyke, Altai, China: *Geological Journal of China Universities (Gaoxiao Dizhi Xuebao)*, v. 6, p. 40–52 [in Chinese with English abstract].
